# 1 Selective sweeps influence diversity over 2 large regions of the mouse genome

3

4 Tom R. Booker<sup>1,2</sup>, Benjamin C. Jackson<sup>3</sup>, Rory J. Craig<sup>3</sup>, Brian Charlesworth<sup>3</sup>, Peter D. Keightley<sup>3</sup>

5

6 1. Department of Zoology, University of British Columbia, Vancouver, British Columbia,  
7 Canada.

8 2. Department of Biological Sciences, University of Calgary, Calgary, Alberta, Canada.

9 3. Institute of Evolutionary Biology, University of Edinburgh, Edinburgh, UK. EH9 3FL

10

11 Correspondence: [booker@zoology.ubc.ca](mailto:booker@zoology.ubc.ca)

12

13

## 14 Abstract

15 To what extent do substitutions in protein-coding versus gene-regulatory regions contribute to  
16 fitness change over time? Answering this question requires estimates of the extent of selection  
17 acting on beneficial mutations in the two classes of sites. New mutations that have advantageous  
18 or deleterious fitness effects can induce selective sweeps and background selection, respectively,  
19 causing variation in the level of neutral genetic diversity along the genome. In this study, we  
20 analyse the profiles of genetic variability around protein-coding and regulatory elements in the  
21 genomes of wild mice to estimate the parameters of positive selection. We find patterns of  
22 diversity consistent with the effects of selection at linked sites, which are similar across mouse  
23 taxa, despite differences in effective population size and demographic history. By fitting a model  
24 that combines the effects of selective sweeps and background selection, we estimate the strength  
25 of positive selection and the frequency of advantageous mutations. We find that strong positive  
26 selection is required to explain variation in genetic diversity across the murid genome. In  
27 particular, we estimate that beneficial mutations in protein-coding regions have stronger effects  
28 on fitness than do mutations in gene-regulatory regions, but that mutations in gene-regulatory  
29 regions are more common. Overall though, our parameter estimates suggest that the cumulative  
30 fitness changes brought about by beneficial mutations in protein-coding may be greater than  
31 those in gene-regulatory elements.

32

33

34

## 35 Introductions

36 Understanding the relative contributions of protein-coding and gene regulatory variation to  
37 adaptation is a long-standing goal of evolutionary biology. Molecular changes in protein-coding  
38 and gene regulatory regions contribute to evolution, but in classic essays King and Wilson (1975)  
39 and Carroll (2005) argued that changes in gene expression may dominate adaptive evolution. King  
40 and Wilson (1975) reasoned that since nucleotide identity between human and chimpanzee  
41 proteins is around 99%, there are too few protein sequence difference between the species,  
42 implying that changes in gene regulation are probably required to explain the many phenotypic  
43 differences between the species. Carroll's (2005) argument highlighted the idea that molecular  
44 changes in the gene regulatory apparatus may have smaller pleiotropic effects than those in  
45 protein-coding regions, so that changes in gene expression may dominate adaptive evolution.  
46 However, Hoekstra and Coyne (2007) attempted to refute these arguments, maintaining that  
47 there is insufficient evidence to decide whether adaptation is primarily driven by changes in  
48 protein sequences or gene regulatory elements. For example, a 1% difference in protein sequence  
49 between humans and chimpanzees could still result in a very large number of phenotypic  
50 differences. However, the contribution of individual variants to additive genetic variance for a trait  
51 is expected to be proportional to the square of their phenotypic effect sizes, assuming semi-  
52 dominance (Fisher 1918; Falconer and Mackay 1996). Without an understanding of the  
53 frequencies of new mutations, their effect sizes, and the strength of selection acting on them, the  
54 question of the contribution of molecular evolution in different genomic elements to adaptation  
55 will remain intractable.

56  
57 Information on the strength of selection acting on beneficial mutations and the rates at which  
58 they occur can be obtained by analysing patterns of neutral genetic diversity. Because genetically  
59 linked sites do not evolve independently, natural selection acting at a given site may leave  
60 signatures at linked sites that are informative about the strength and mode of selection. The  
61 effects of selection at linked sites on neutral genetic diversity depend on the frequency and  
62 strength of selected mutations and the rate of recombination (Charlesworth 2012; Hermisson and  
63 Pennings 2017; Stephan 2019). Several modes of selection at linked sites have been identified. Of  
64 specific relevance to this study are background selection (BGS), caused by the removal of  
65 deleterious mutations from a population, and selective sweeps, caused by the spread of  
66 advantageous variants. The classic footprint of a selective sweep is a trough in nucleotide diversity

67 at neutral sites surrounding an adaptive substitution. The reduction in nucleotide diversity caused  
68 by a sweep is proportional to the ratio of the strength of selection acting on the causal mutation  
69 to the local recombination rate (Barton 2000). Using such information, Wiehe and Stephan (1993)  
70 developed a model of recurrent selective sweeps and used it to estimate the frequency and  
71 strength of advantageous mutations in *Drosophila melanogaster*. They fitted their model of  
72 sweeps to the relationship between recombination rate and nucleotide diversity for a number of  
73 loci sampled across the *D. melanogaster* genome. At the time of their analysis, the theory of BGS  
74 was in its infancy, and models combining the effects of BGS and sweeps had not been developed.  
75 However, the effects of BGS are expected to be ubiquitous across the genome (McVicker et al.  
76 2009; Comeron, 2014; Elyashiv et al. 2016; Pouyet et al. 2018), and conceptually similar studies to  
77 Wiehe and Stephan (1993) have shown that controlling for BGS is important when parametrizing  
78 sweep models (Kim and Stephan 2000; Comeron 2014; Elyashiv et al. 2016; Campos et al. 2017).

79  
80 In *Drosophila*, there are reductions in average diversity around recent nonsynonymous  
81 substitutions, which are greater than those observed around synonymous substitutions (Sattath et  
82 al. 2011; Elyashiv et al. 2016). To investigate the causes of this difference, Elyashiv et al. (2016)  
83 fitted a model of sweeps and BGS to genome-wide variation in genetic diversity in *D.*  
84 *melanogaster* and found that a combination of BGS and selective sweeps provided a close fit to  
85 the observed data. From the fit of their model to empirical data, Elyashiv et al. (2016) inferred a  
86 distribution of fitness effects for advantageous mutations that included a class of very strongly  
87 selected mutations and a more mildly beneficial class. In both mice and humans, however, there is  
88 very little difference between the profiles of diversity around recent nonsynonymous and  
89 synonymous substitutions (Hernandez et al. 2011; Halligan et al. 2013). In these species, dips in  
90 average nucleotide diversity have been observed in genomic regions surrounding whole functional  
91 elements, such as protein-coding exons or conserved non-coding elements, which may reflect the  
92 cumulative effects of recurrent selective sweeps and BGS (Hernandez et al. 2011; Halligan et al.  
93 2013; Booker and Keightley 2018)

94  
95 Natural populations of mice in the genus *Mus* are excellent material for the study of adaptive  
96 evolution in different regions of the mammalian genome. Their populations are very large  
97 compared to other mammals (Leffler et al. 2012), so there is likely to be more power for  
98 population genetic analyses to differentiate between the evolutionary processes that affect  
99 genetic variability. Previous studies in mice have established that both protein-coding genes and

100 regions putatively involved in gene regulation have an excess of sequence differences from sister  
101 taxa compared to that expected under a model of purifying selection, suggesting widespread  
102 adaptive molecular evolution (Halligan et al. 2010, 2013). Halligan et al. (2013) analysed a sample  
103 of *Mus musculus castaneus* individuals and estimated that there have been around 1.3 million and  
104 0.38 million positively selected regulatory and nonsynonymous changes, respectively, over the  
105 period since this subspecies began to diverge from rats. At face value, this finding suggests that  
106 changes in gene regulation may dominate adaptive evolution in mice. However, Halligan et al.  
107 (2013) also showed that there are much larger reductions in neutral diversity surrounding protein-  
108 coding exons than around gene regulatory elements, and that BGS could not fully explain these  
109 observations (Halligan et al. 2013; Booker and Keightley 2018). Halligan et al. (2013) concluded  
110 that this difference in neutral diversity may reflect differences in the strength of positive selection  
111 acting on the different classes of sites.

112  
113 Building on Halligan et al. (2013), we have sought to tease apart the contributions of BGS and  
114 sweeps to the patterns of nucleotide diversity observed in the Eastern house mouse *M. m.*  
115 *castaneus* (Booker and Keightley 2018). We inferred the distribution of fitness effects (DFE) for  
116 deleterious and advantageous mutations occurring in protein-coding genes and gene regulatory  
117 elements, by analysing the frequency distribution of derived allele frequencies (the unfolded site  
118 frequency spectrum, uSFS). Based on analysis of the uSFS, we found that a model of positive  
119 selection was insufficient to explain the troughs in nucleotide diversity around protein-coding  
120 exons or conserved non-coding elements (CNEs). However, we found that infrequent, strongly  
121 beneficial mutations, which have negligible effect on the uSFS, potentially could do so (Booker and  
122 Keightley 2018). This is because infrequent, strongly advantageous mutations may substantially  
123 influence diversity at linked sites, while making very little contribution to the uSFS. We concluded  
124 that the parameters of positive selection are very difficult to accurately estimate from the uSFS  
125 alone (Booker 2020). To understand the relative strengths of selection acting on protein-coding  
126 versus gene regulatory regions, the analysis of a model of selective sweeps fitted to patterns of  
127 neutral genetic variability may be more powerful.

128  
129 In this study, we examine the reductions in nucleotide diversity surrounding protein-coding exons  
130 and conserved non-coding elements in wild mice, and attempt to tease apart the modes of  
131 selection operating on the two different elements. We fitted a model of selective sweeps to the  
132 patterns observed in *M. m. castaneus*, while correcting for the confounding effects of BGS. Our

133 analysis provides evidence that the strength of selection acting on beneficial mutations in protein-  
134 coding exons is far greater than that acting on conserved non-coding elements. Using a simple  
135 model of the fitness change brought about by positive selection, we find that selection on protein-  
136 coding regions may contribute more to fitness change, despite positive selection occurring more  
137 frequently in regulatory regions of the genome. We then compared patterns of putatively neutral  
138 diversity among the principal subspecies of *Mus musculus* and their sister species *Mus spretus*. We  
139 find that the profiles of nucleotide diversity and the inferred distributions of fitness effects among  
140 each group are similar, suggesting that the contributions of positive selection to protein-coding  
141 and regulatory change are similar in the different mouse taxa. Note that our goal in this study is  
142 not to identify the individual loci that selection has recently acted on; for a recent study  
143 identifying the targets of recent selection in wild mice see (Lawal et al. 2021).

## 144 Results and Discussion

145 Profiles of genetic diversity around protein-coding exons and conserved non-coding  
146 elements in multiple mouse lineages

147 If different mouse lineages are subject to similar selection pressures, we might expect that they  
148 exhibit similar patterns of diversity across their genomes. We thus compared patterns of genetic  
149 diversity in populations of the house mouse *Mus musculus* and the sister species *Mus spretus*. We  
150 analysed data previously reported by Halligan et al. (2013) and Harr et al. (2016) for the two  
151 mouse species, *M. musculus* and *M. spretus*. For *M. musculus*, we analysed samples from the  
152 three sub-species, *M. m. castaneus*, *M. m. domesticus* and *M. m. musculus*. The *M. m. castaneus*  
153 individuals ( $n = 10$ ) were from Himachal Pradesh, India. For *M. m. domesticus*, populations were  
154 sampled in France ( $n = 8$ ), Germany ( $n = 8$ ) and Iran ( $n = 8$ ). In the case of *M. m. musculus*,  
155 populations were sampled in Afghanistan ( $n = 6$ ), the Czech Republic ( $n = 8$ ) and Kazakhstan ( $n =$   
156  $8$ ). The *M. spretus* individuals were sampled in Spain ( $n = 8$ ). We refer to the different sub-  
157 populations of *M. m. domesticus* and *M. m. musculus* by the countries where the individuals were  
158 sampled.

159  
160 We identified conserved non-coding elements (CNEs) in murid rodents using a 40-way alignment  
161 of placental mammals by means of the *phastCons* approach (Siepel et al. 2005). Following  
162 Williamson et al. (2014), the genomes of *M. musculus* and other rodents were masked in the  
163 alignment to limit ascertainment bias affecting elements that have recently diverged in the rodent  
164 lineage. CNEs identified using *phastCons* overlap with features such as promoters and enhancers  
165 (Lindblad-Toh et al. 2011), and thus are likely to have roles in the regulation of gene expression.

166  
167 For each of the mouse taxa, we examined putatively neutral nucleotide diversity ( $\pi$ ) in genomic  
168 regions surrounding protein-coding exons and CNEs using the methods described by Halligan et al.  
169 (2013). Briefly, polymorphism data were extracted in genomic windows surrounding protein-  
170 coding exons and CNEs. We masked any putatively functional sites from analysis windows; these  
171 included the exons (including UTRs) of genes annotated in the *M. musculus* genome by ENSEMBL  
172 in release 93 (Howe et al. 2021) and CNEs. For each analysis window, we calculated the genetic  
173 map distance between the centre of the window and the focal functional element, assuming  
174 either the pedigree-based recombination map for *M. musculus* constructed by Cox et al. (2009) or  
175 a recombination map estimated using linkage disequilibrium (LD) in the *M. m. castaneus* genome

176 (Appendix). We excluded analysis windows that had a scaled genetic distance of  $4N_e r < 1$ , because  
177 downstream analyses assume that sites are not tightly linked. All remaining analysis windows  
178 were collated into genetic distance bins. The average number of pairwise differences (i.e.  
179 nucleotide diversity) and nucleotide divergence from *Rattus rattus* were calculated for each  
180 genetic distance bin. For all analyses, we only examined the autosomes. Downstream analyses  
181 were sensitive to the assumption of a single mutation rate, so we excluded hypermutable CpG-  
182 prone sites from our analyses, identified as sites that were preceded by a C or succeeded by a G in  
183 the 3' to 5' direction in the reference genome (see Materials and Methods).

184

185 The choice of recombination map had a substantial effect on the profiles of average nucleotide  
186 diversity observed around protein-coding exons and CNEs (Figures S1, S2). When assuming the  
187 pedigree-based Cox map, we found that nucleotide diversity was slightly higher in the immediate  
188 flanks of both exons and CNEs (with distances calculated using the estimated recombination  
189 frequency), and lower in regions far from functional elements, compared to results with the LD-  
190 based map (Figure S1, S2). These differences are consistent with the possibility that the Cox map,  
191 which was constructed with a far smaller number of markers than the LD-based map, does not  
192 fully capture genomic regions that have either unusually low or high recombination rates. A  
193 possible consequence of this would be that analysis windows at intermediate distances from  
194 functional elements may appear to be more tightly linked to those elements than they actually  
195 are. This is supported by differences in numbers of sites falling into various genetic distance bins  
196 between the pedigree-based and LD-based recombination maps (Figures S1 and S2). However,  
197 both selective sweeps and BGS can induce LD, and may thus downwardly bias recombination rate  
198 estimates obtained using LD-based approaches (Clark et al., 2010). For this reason, we focus on  
199 results obtained assuming the pedigree-based Cox map for the remainder of the paper. We  
200 present parallel analyses, which assume the LD-based map, in the supplement and describe  
201 differences between the respective conclusions in the Discussion.

202

203 All mouse taxa exhibited dips in nucleotide diversity around protein-coding exons and CNEs  
204 (Figure 1). To quantify the relative reduction in diversity for each taxa, we calculated  $\pi/\pi_{Ref}$ , the  
205 ratio of  $\pi$  to the average  $\pi$  at distances greater than  $4N_e r = 1,500$  and less than  $4N_e r = 2,500$  for  
206 exons, and distances greater than  $4N_e r = 150$  and less than  $4N_e r = 250$  for CNEs. The distances for  
207 determining  $\pi_{Ref}$  were chosen based on where  $\pi$  began to flatten off with increasing distance from  
208 functional elements. Despite the existence of large differences in genome-wide diversity between



209 the taxa, troughs in  $\pi/\pi_{Ref}$  around exons and CNEs were very similar among mouse lineages  
210 (Figures 1, S1, S2). Nucleotide diversity was reduced by 20-30% and 10-20% around protein-coding  
211 exons and CNEs, respectively (Figure 1). The dips in diversity extended to genetic distances of up  
212 to approximately  $4N_e r = 1,000$  around exons, but only to  $4N_e r = 100$  around CNEs (Figure 1).  
213 Consistent with Halligan et al. (2013), we observed little reduction in between-species divergence  
214 around the edges of protein-coding exons, suggesting that mutation rate variation is not a  
215 substantial driver of the observed dips in diversity. However, in the immediate flanks of CNEs, we  
216 observed a trough in divergence. This may be explained if the *phastCons* approach used to identify  
217 CNEs did not readily identify weakly conserved sequences at the edge of more strongly conserved  
218 blocks. This would imply that that some sites subject to purifying selection tightly linked to the  
219 CNEs may have remained unannotated in our analysis. However, the troughs in nucleotide  
220 divergence around CNEs were substantially narrower than the corresponding troughs in diversity.  
221 This implies that reduced mutation rates or constrained sites may account for part of the diversity  
222 drop around CNEs, but do not explain all of it (Figure S1, S2).

223  
224 An important caveat concerning the above analysis is that the mouse taxa that are subject of the  
225 analysis are very closely related, i.e. it has been estimated that the *M. musculus* sub-species  
226 complex began to diverge around 350,000 years ago (Geraldès et al, 2011). Furthermore, Geraldès  
227 et al (2011) found extensive shared nucleotide variation among the sub-species, and that the  
228 average  $F_{ST}$  among the members of the sub-species complex ranged from 0.43 to 0.72. Thus,  
229 patterns of polymorphism identified in the species are likely to be highly non-independent, and  
230 differences in  $\pi$  between the groups presumably reflect fluctuations in population sizes.

231

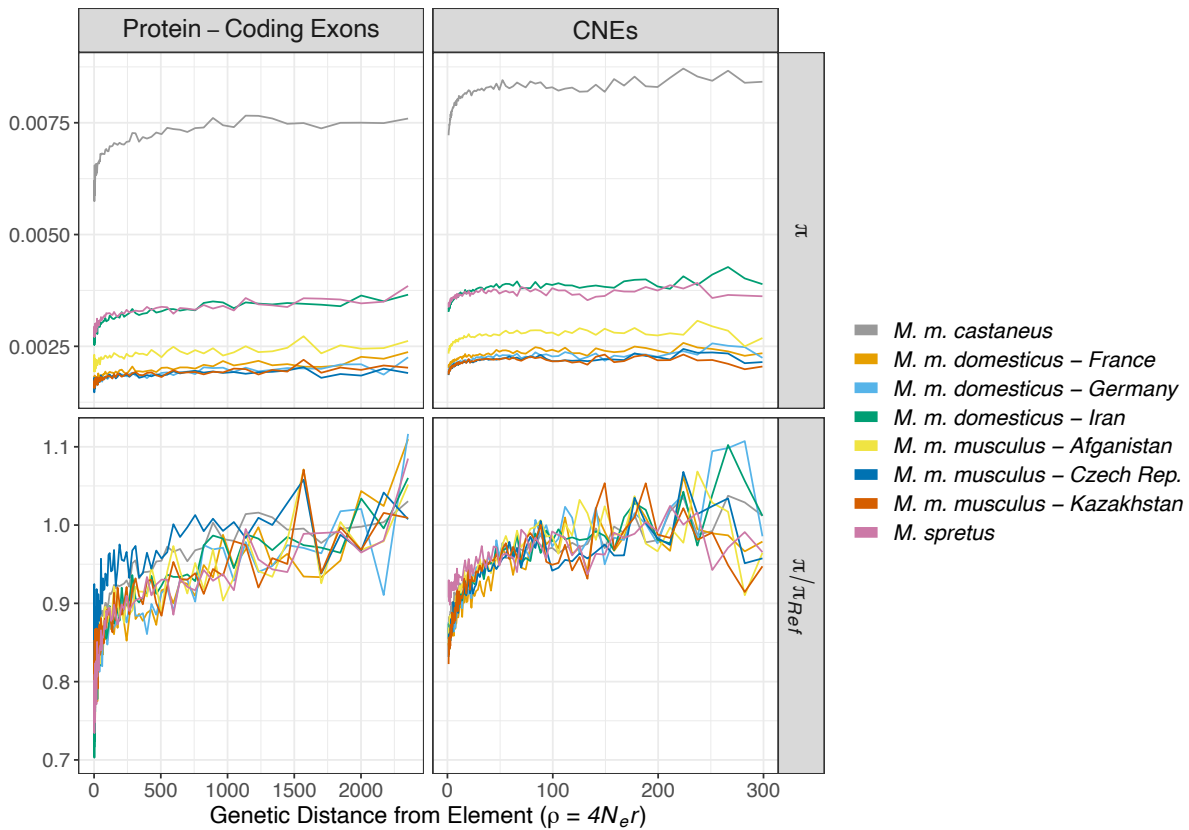

232

233

234 **Figure 1** Nucleotide diversity ( $\pi$ ) in regions surrounding protein-coding exons and CNEs in wild  
235 mice. Population-scaled recombination rates ( $4N_e r$ ) were calculated assuming the recombination  
236 map for *M. musculus* constructed by Cox et al. (2009).  $\pi_{Ref}$  is the mean diversity calculated for sites  
237 far from functional elements.

238

239

240 Nucleotide polymorphism and divergence in wild mouse genomes

241 A first step for determining whether there was a consistent signal of natural selection across the  
242 mouse genomes, was to identify three classes of functional sites and two classes of putatively  
243 neutral sites as follows. For protein-coding gene orthologues between mouse and rat, we  
244 identified 0-fold degenerate nonsynonymous sites and UTRs, and used 4-fold degenerate sites as a  
245 neutral comparator. Protein-coding sites within the binding motifs of exonic splice enhancers  
246 including synonymous sites appear to be subject to purifying selection, implying that 4-fold sites  
247 located within them cannot be considered as neutral (Savisaar and Hurst 2018). We therefore  
248 excluded all synonymous and non-synonymous sites located within regions that matched such  
249 binding motifs. The total numbers of polymorphic and invariant sites that passed filtering for each

250 of the mouse taxa are detailed in Supplementary File 1. We identified sites in the upstream and  
251 downstream flanks of individual CNEs for use as neutral comparators (see Methods).

252

253 To determine whether there was a consistent signal of natural selection, we assessed nucleotide  
254 diversity and lineage-specific divergence for the three classes of putatively functional sites (Figure  
255 2). In all cases, functional site diversity and divergence were lower than for their putatively  
256 neutral counterparts, consistent with the action of purifying selection (Figure 2). Note that the *M.*  
257 *m. castaneus* data have been analysed in this way before (Halligan et al. 2013; Booker and  
258 Keightley 2018) and, as previously reported, *M. m. castaneus* had the highest nucleotide diversity  
259 of all *Mus* taxa surveyed (Figure 2; Harr et al. 2016). However, nucleotide divergence reported is  
260 the lineage specific divergence accumulated since the focal taxa began to diverge from *Mus*  
261 *famulus*, so that divergence estimates for the various mouse taxa are highly non-independent  
262 because of shared histories.

263

264 All populations had nonzero Tajima's *D* for putatively neutral sites, indicating the presence of  
265 either non-equilibrium population dynamics or genome-wide effects of selection (Figure 2). Mouse  
266 populations from Western Europe and Kazakhstan exhibited positive Tajima's *D* for all classes of  
267 sites (Figure 2), consistent with a recent history of admixture between different populations or  
268 population bottlenecks (Charlesworth and Charlesworth 2010, pp.290-291). A population  
269 structure analysis of the mice analysed in this study did not suggest strong admixture between the  
270 sampled groups (Harr et al. 2016), but we cannot rule out the possibility of admixture with other  
271 unsampled mouse populations. *M. m. castaneus* and populations sampled in Iran and Afghanistan  
272 had strongly negative Tajima's *D* values, consistent with recent population expansion or a  
273 genome-wide effect of recurrent selective sweeps (Charlesworth and Charlesworth 2010, pp.290,  
274 414). Indeed, simulations modelling *D. melanogaster* populations have shown that recurrent,  
275 strong selective sweeps can induce negative Tajima's *D* as large as -0.156 at synonymous sites  
276 (Campos and Charlesworth 2019). It worth noting that Tajima's *D* is sensitive to the number of  
277 individuals and nucleotides analysed (Simonsen et al. 1995), which vary among the mouse taxa, so  
278 it is not straightforward to interpret differences in demographic history or strength of selection  
279 from these data.

280

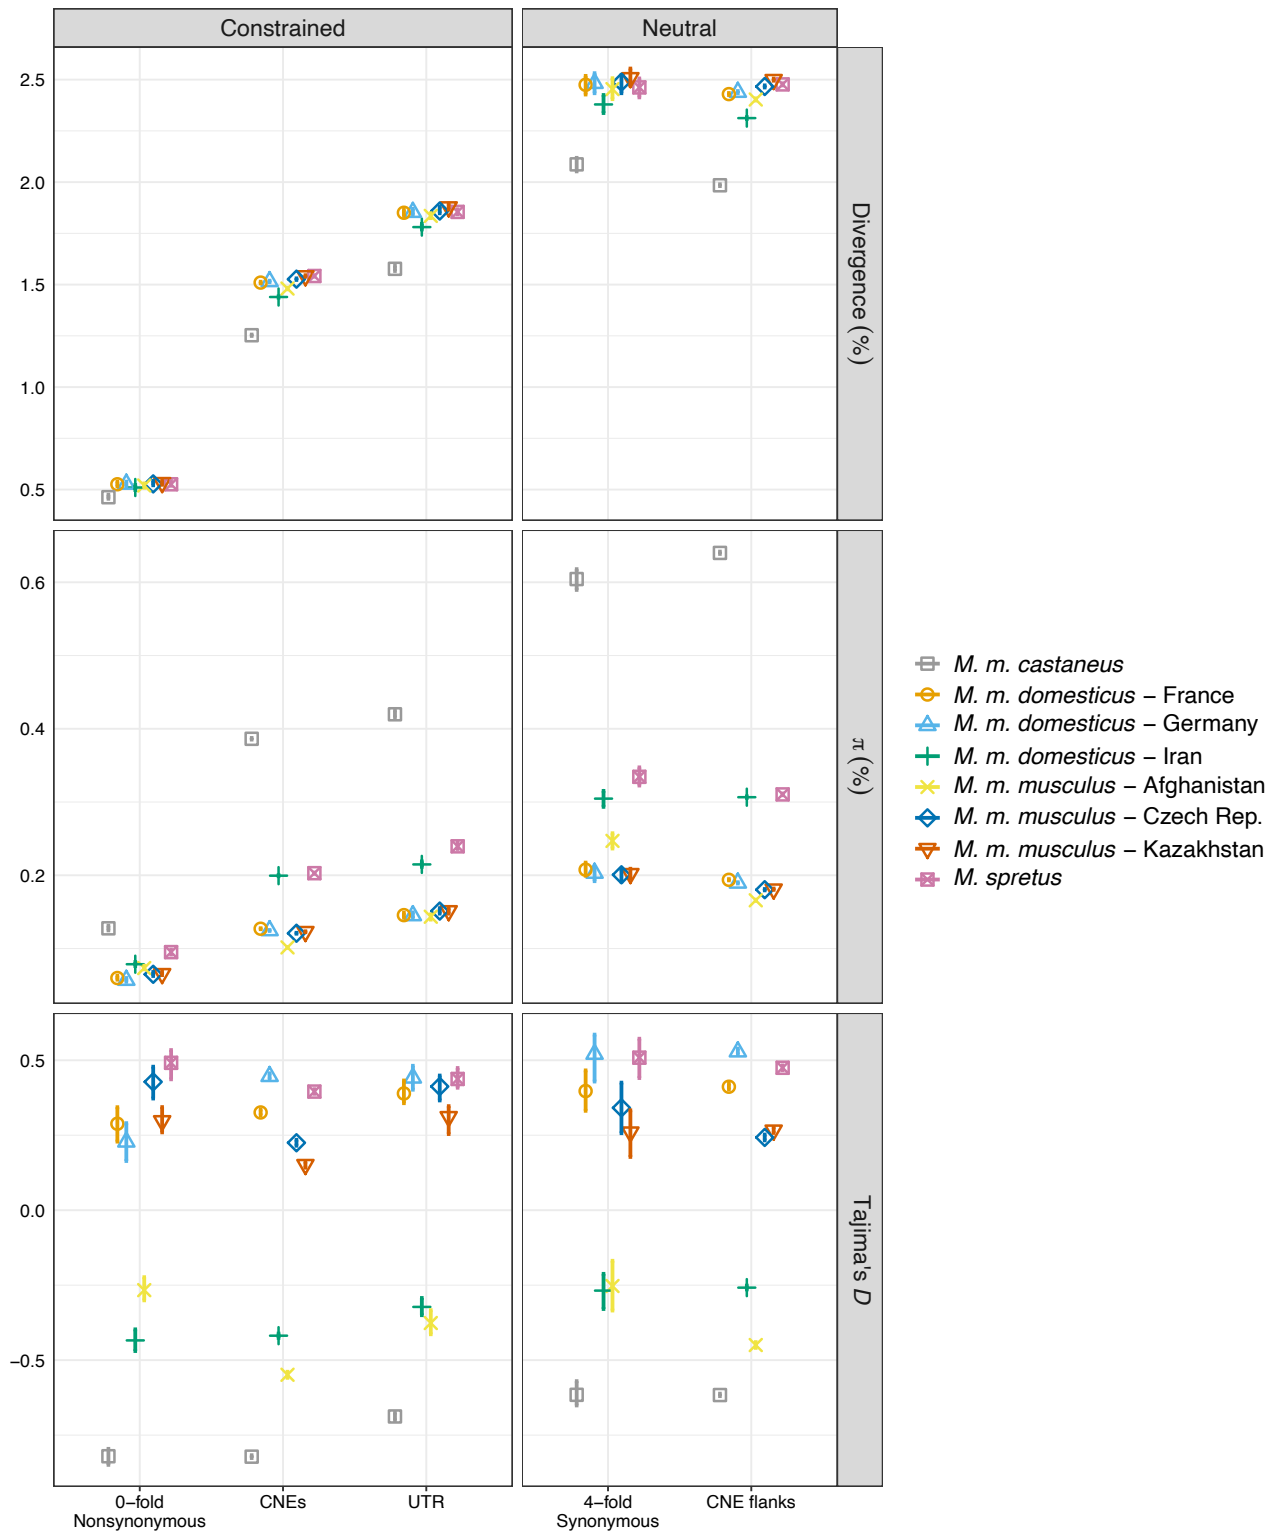

281

282 **Figure 2** Population genetic summary statistics for three classes of putatively functional sites in the  
 283 mouse genome and two putatively neutral comparators. Nucleotide diversity ( $\pi$ ) and Tajima's  $D$   
 284 are also shown. Error bars represent 95% confidence intervals based on 100 bootstrap samples.  
 285 Those not visible are shorter than the height of the points.

286

287 The distribution of fitness effects for deleterious mutations inferred from the uSFS  
288 To parameterise a model of BGS, we estimated the distribution of fitness effects (DFE) for  
289 deleterious mutations in each of the mouse taxa by fitting a model of mutation-selection-drift  
290 balance to the unfolded site frequency spectrum (uSFS). The uSFS is a vector of 0, 1, 2, ...,  $k$  counts  
291 of derived alleles, where  $k$  is the number of haploid genomes sampled. Estimates of the DFE can  
292 be obtained by contrasting the uSFS for a selected class of sites and a neutral comparator. Here,  
293 we estimated the uSFS for the three classes of functional sites and their putatively neutral  
294 comparator sequences. For each class of sites, we fitted a gamma distribution of deleterious  
295 mutational effects using *polyDFE* (v2; Tataru and Bataillon 2019). Tataru et al. (2017) showed that  
296 *polyDFE* provides robust estimates of the DFE for deleterious mutations based on the uSFS if a  
297 discrete class of beneficial mutations is also inferred. While the inferred beneficial mutation  
298 parameters are often spurious, including them seems to improve inference of the DFE for  
299 deleterious mutations (Booker 2020). Finally, while the gamma distribution is an arbitrary choice  
300 of model, and other probability distributions may give better fits to the data, it can capture the  
301 important features of the DFE, even if the underlying distribution is multi-modal (Kousathanas and  
302 Keightley 2013). Additionally, using the same probability distribution across taxa provides a  
303 consistent framework for comparing molecular evolution in the different mouse groups.

304  
305 The estimated DFEs were all highly leptokurtic and had similar estimated parameters across the  
306 different taxa (Figure 3; Supplementary Table 2). Using *polyDFE*, the DFE is estimated in terms of  
307 the scaled selection coefficient for deleterious mutations,  $2N_e s_d$ , where  $s_d$  is the reduction in  
308 fitness experienced by an individual homozygous for the mutation (which is assumed to be semi-  
309 dominant). Figure 3 shows the distribution of effects of deleterious mutational effects discretised  
310 into three ranges; nearly neutral mutations with  $2N_e s_d < 1$ , mildly deleterious mutations with  $1 \leq$   
311  $2N_e s_d < 10$  and mutations with  $2N_e s_d \geq 10$ . Consistent with previous studies, amino-acid changing  
312 mutations were found to have the highest probability of having strongly deleterious effects  
313 (Halligan et al. 2013) and non-coding elements (UTRs and CNEs) had higher fractions of nearly  
314 neutral mutations (Figure 3). For 0-fold degenerate sites and CNEs, *M. m. castaneus* had the  
315 smallest proportion of nearly neutral variants among the taxa. The DFE inferred for the *M. m.*  
316 *musculus* sample from Afghanistan had the highest proportion of strongly deleterious mutations in  
317 UTRs, but this may reflect sampling error, since there were only 6 individuals and the population  
318 had among the lowest levels of nucleotide diversity (Figure 2).

319

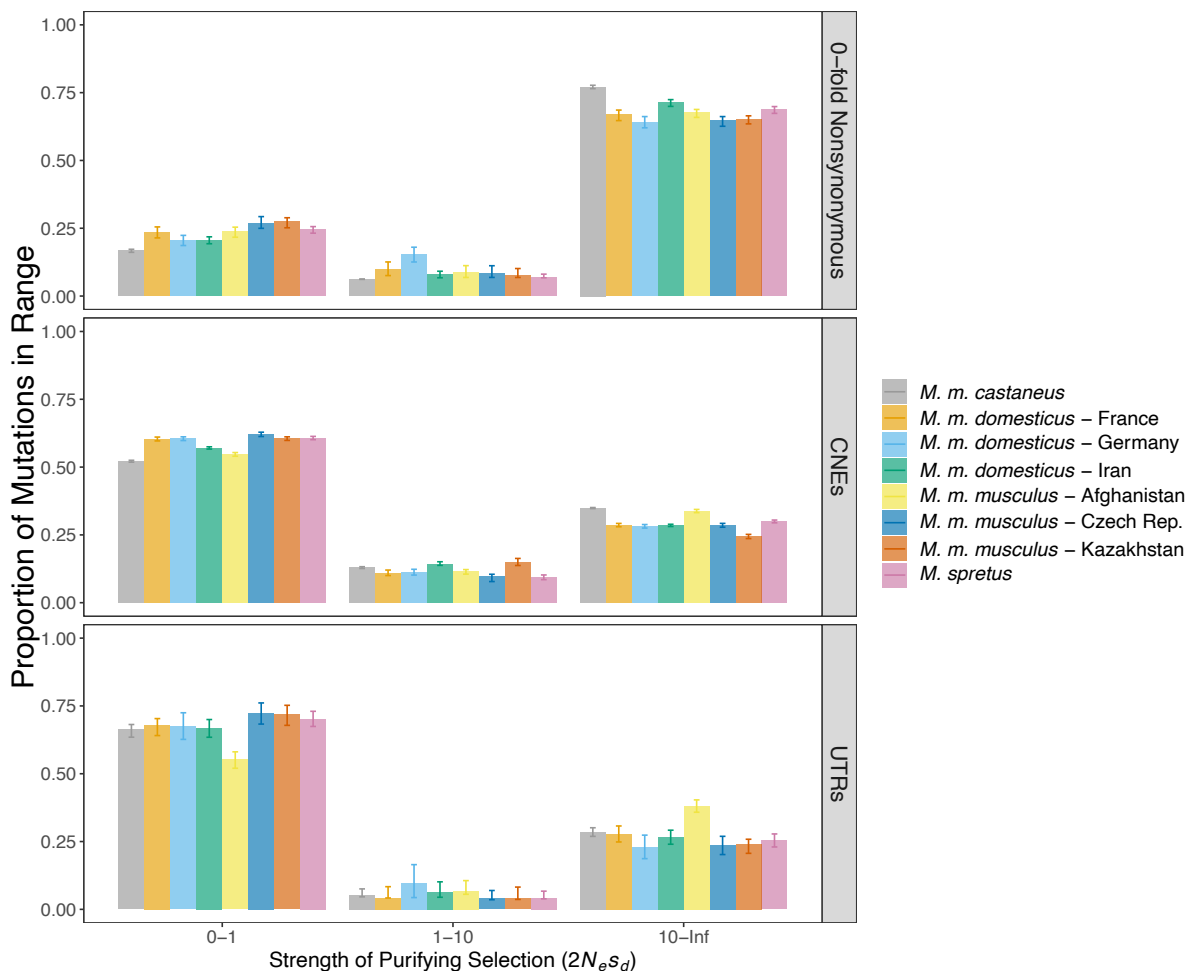

320

321 **Figure 3** Graphical representation of the distribution of fitness effects of deleterious mutations for  
 322 three classes of functional sites in wild mice. The figure shows the proportion of mutations falling  
 323 into three ranges of effect size assuming a gamma DFE for each taxa and class of sites. Error bars  
 324 indicate the 95% range based on 100 bootstrap replicates.

325

326 The contribution of background selection to patterns of diversity around functional  
 327 elements

328 Using the inferred DFE parameters for deleterious mutations, we can estimate the contribution of  
 329 BGS to reductions in nucleotide diversity across the mouse genome. Specifically, we used  
 330 simulations modelling *M. m. castaneus* to estimate the contribution of BGS to troughs in diversity  
 331 observed around functional elements (Figure S3). Our simulations incorporated recombination  
 332 rate variation (assuming either the pedigree-based or LD-based recombination maps, see below),  
 333 the distribution of exons, UTRs and CNEs in the mouse genome, and the distributions of fitness  
 334 effects for deleterious mutations estimated for those elements. We estimated values of  $\pi$  around  
 335 both exons and CNEs from simulated data in the same manner as for the empirical data. Using the

336 simulation results, we estimated the reduction in diversity caused by background selection,  $B$ ,  
337 around functional elements for each genetic distance bin. We calculated  $B = \pi/\pi_0$ , where  $\pi$  is the  
338 nucleotide diversity observed in the simulation and  $\pi_0$  is the neutral expectation. As we found  
339 previously (Booker and Keightley 2018), BGS could not fully explain the reductions in diversity  
340 observed around protein-coding exons or CNEs (Figure S3).

341  
342 Inferences about the strength of BGS made under the assumption of constant population size be  
343 misleading if there has been recent population size change. For example, a population bottleneck  
344 may lead to the accumulation of weakly deleterious mutations if drift overwhelms selection. As  
345 population size increases after a bottleneck, rapid purging of weakly deleterious mutations can  
346 occur, leading to deviations from the expectations of standard models of BGS, which assume  
347 constant population size (Torres et al. 2020; Johri et al. 2021). We have previously inferred a  
348 model of demographic history for *M. m. castaneus*, which suggested that population size has  
349 recently increased following a bottleneck (Booker and Keightley 2018). We performed an  
350 additional set of simulations incorporating this demographic history, but found that the relative  
351 reductions in diversity around both protein-coding exons and CNEs were very similar to those  
352 observed under constant population size (Figure S4). Note that the trajectory of the demographic  
353 history (bottleneck followed by recovery) we inferred may be an artefact of BGS (Ewing and  
354 Jensen 2016; Johri et al. 2021). However, we proceeded with our analysis assuming estimates of  $B$   
355 for a constant population size, because the variations in  $B$  around exons and CNEs were very  
356 similar with or without population size change.

357  
358 Parameters of beneficial mutations obtained from patterns of nucleotide diversity

359 We estimated the parameters of beneficial mutations occurring in protein-coding and gene  
360 regulatory regions by fitting a model that combines the effects of BGS and recurrent selective  
361 sweeps to troughs in average nucleotide diversity around functional elements (see Materials and  
362 Methods). The model quantifies the reduction in neutral diversity surrounding the average exon or  
363 CNE, assuming that they are 150bp and 52bp long, respectively. A key parameter in the model is  
364  $\pi_0 = 4N_e\mu$ , the nucleotide diversity expected under neutrality in the absence of selection at linked  
365 sites, where  $N_e$  is the effective population size and  $\mu$  is the mutation rate per basepair. Estimation  
366 of  $\pi_0$  is problematic, however, and  $\pi_0$  may even be unobservable in empirical data, given the  
367 ubiquity of selection at linked sites (Kern and Hahn 2018). In the empirical data,  $\pi$  levelled off at

368 different values for protein-coding exons and CNEs (Figure 1, S1, S2). However, our simulations  
369 predicted that  $B$  should plateau at around 0.95 in genomic regions surrounding both protein-  
370 coding exons and CNEs (Figure S3).  $B$  was not predicted to plateau at 1.0 in our simulations,  
371 because we modelled the distribution of all functional elements in the genome, so that a site may  
372 be influenced by BGS generated by many surrounding elements. Our simulations did not model  
373 sweeps, so simply dividing empirical  $\pi$  by our estimated  $B$  would give an underestimate of  $\pi_0$ ,  
374 because the reduction in diversity caused by positive selection was not included. When analysing  
375 variation in  $\pi$ , we therefore assumed values of  $\pi_0 = 0.0081$  and  $0.0091$  for protein-coding exons  
376 and CNEs, respectively, to reflect the different levels at which diversity plateaued.

377  
378 We proceeded to fit models combining BGS and selective sweeps to the troughs in diversity  
379 around protein-coding exons and CNEs in *M. m. castaneus* assuming various models for the effects  
380 of advantageous mutations. We estimated the strength of selection acting on new, semi-dominant  
381 beneficial mutations as  $\gamma_a = 4N_e s_a$ , where  $s_a$  is the increase in relative fitness experienced by  
382 heterozygotes. We also estimated  $p_a$ , the proportion of new advantageous mutations in a  
383 functional element. We found that a model with two classes of advantageous mutations gave a  
384 better fit than a single class of mutations or an exponential distribution of effects (as judged by  
385 AIC; Supplementary File 3). This result held regardless of the recombination map that was  
386 assumed (Supplementary File 3).

387

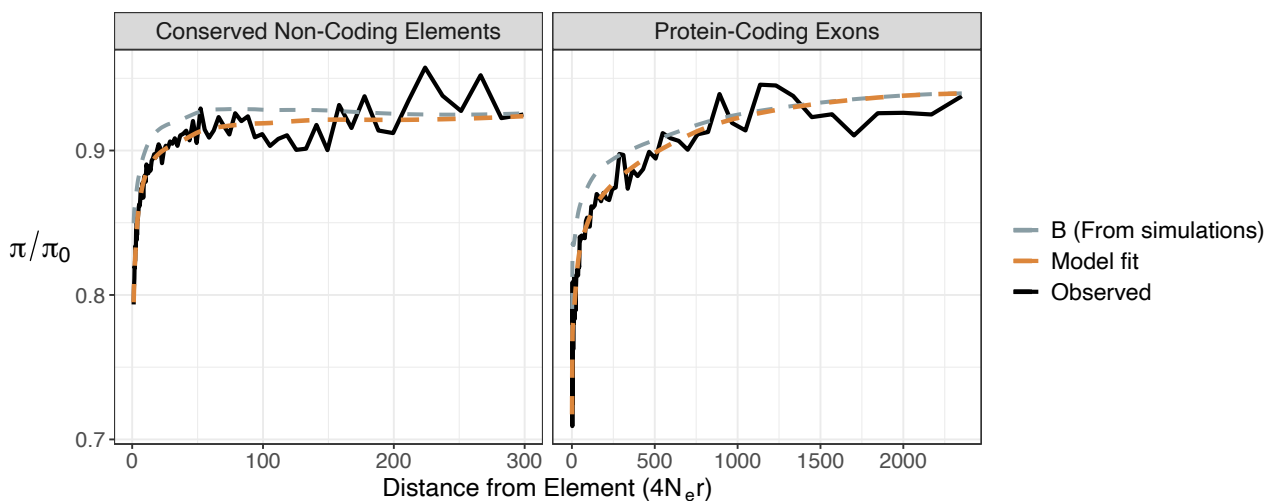

389 **Figure 4** The reduction of scaled nucleotide diversity around protein-coding exons and CNEs in *M.*  
390 *m. castaneus*, predicted by fitting a model combining the effects of background selection and  
391 selective sweeps to the observed data. Genetic distances were calculated assuming the pedigree-



392 based recombination map constructed by Cox et al. (2009). The effect of background selection ( $B$ )  
393 was estimated using simulations.

394

395 For both protein-coding exons and CNEs, we found that the best fitting model included a class of  
396 strongly advantageous mutations and a class of more mildly beneficial mutations (Table 1). When  
397 assuming the pedigree-based Cox map, we estimated the scaled fitness effects of the strongly  
398 selected class ( $\gamma_s$ ) to be 6,200 and 1,900 for protein-coding exons and CNEs, respectively. The  
399 proportions of mutations with these selection coefficients were  $9 \times 10^{-6}$  and  $3 \times 10^{-4}$ , respectively.  
400 The more mildly beneficial class of mutations inferred for protein-coding exons and CNEs had  
401 scaled effects of 210 and 7.0, respectively, and the proportion of mutations with these effects  
402 were  $3.5 \times 10^{-4}$  and  $1.8 \times 10^{-2}$ , respectively. In the case of CNEs, although two classes of  
403 advantageous mutational effects gave the best fit to the data, the coefficient of variation for the  
404 parameter estimates of the mildly selected class was large, and evidence for mildly beneficial  
405 mutations is fairly weak in this case (Table 1).

406

407 The choice of recombination map strongly affected the estimated selection parameters obtained.  
408 Use of the pedigree-based Cox map resulted in estimated selection coefficients that were typically  
409 smaller than those obtained when assuming the LD-based recombination map (Supplementary  
410 Table 3). This is because we found the troughs in diversity around both exons and CNEs were  
411 shallower when calculating genetic distances using the pedigree-based map than when using the  
412 LD-based map (Figure S1, S2).

413

414 BGS appears to contribute to the troughs in diversity around both protein-coding exons and CNEs  
415 and causes an overall reduction in neutral diversity (Figure 4). Ignoring the contribution of BGS  
416 (i.e. by setting  $B$  to 1.0 when fitting Equation 4 to the diversity troughs) resulted in a much poorer  
417 model fit (Supplementary File 3). In the absence of BGS, the selection coefficients for  
418 advantageous mutations required to explain the observed data are, as expected, far higher  
419 (Supplementary File 3).

420

421

422

423

424 **Table 1** Parameters of positive selection in *M. m. castaneus* estimated by fitting a model of  
 425 selective sweeps and background selection to troughs in diversity around functional elements. The  
 426 frequency ( $p_a$ ) and scaled selection coefficients ( $\gamma_a$ ) for the two classes of advantageous effects are  
 427 given. Standard errors are shown in square brackets below point estimates.

428

429

| Element              | $\gamma_{a,1}$   | $p_{a,1}$                                          | $\gamma_{a,2}$ | $p_{a,2}$                                          |
|----------------------|------------------|----------------------------------------------------|----------------|----------------------------------------------------|
| Protein-Coding Exons | 6,170<br>[2,650] | $0.80 \times 10^{-5}$<br>[ $0.50 \times 10^{-5}$ ] | 208<br>[105]   | $3.50 \times 10^{-4}$<br>[ $1.80 \times 10^{-4}$ ] |
| CNEs                 | 1,910<br>[673]   | $1.30 \times 10^{-5}$<br>[ $0.60 \times 10^{-5}$ ] | 7.00<br>[3.50] | $1.78 \times 10^{-2}$<br>[ $1.29 \times 10^{-2}$ ] |

430

431 We did not include gene conversion events in our analysis, because gene conversion tracts, which  
 432 have an estimated mean length in mice of 135bp (Paigen et al. 2008), are relatively short  
 433 compared to the genetic distances we analysed (up to 100,000bp and 5,000bp for exons and CNEs,  
 434 respectively). Furthermore, the ratio of the rates of gene conversion and crossover events has  
 435 been estimated to be 0.105 in mice (Paigen et al. 2008). Overall, gene conversion is expected to  
 436 contribute little to the net frequency of recombination between neutral and selected sites.

437

438 The relative contribution of adaptive substitutions in protein-coding and regulatory regions  
 439 to fitness change in mice

440 An important goal of evolutionary biology is to understand the extent to which protein-coding and  
 441 regulatory elements contribute to phenotypic evolution (King and Wilson 1975; Wray 2007; Stern  
 442 and Orgogozo 2008; but see Hoekstra and Coyne 2007). Using our estimated selection parameters,  
 443 we can parameterise the following model of the rate of fitness change per generation ( $\Delta W$ )  
 444 brought about by the fixation of advantageous mutations. For a particular class of sites, assume  
 445 there are  $\eta_a$  nucleotides in the genome at which new mutations occur at rate  $\mu$  per nucleotide site  
 446 per generation. If the size of the breeding population is  $N$ , then  $2N\mu$  new mutations enter the  
 447 population each generation. We assume that a proportion of the new mutations,  $p_a$ , is strongly  
 448 advantageous, with a selection coefficient of  $s_a$  in heterozygous carriers. When the effectiveness  
 449 of selection exceeds that of genetic drift ( $2Nes_a > 1$ ), the fixation probability is approximately  $2s_a$   
 450 (Haldane 1927). Once fixed, advantageous mutations increase population mean fitness by  $s_a/h$ ,  
 451 where  $h$  is the dominance coefficient, giving the following expression:

452

453

$$\Delta W = \frac{4N\mu p_a \eta a^2 \bar{a}}{h} \quad (1).$$

454

455 Since we are interested in the relative contribution to fitness change, and assumed that the  
456 average point mutation rate is the same for CNEs and protein-coding exons, we can thus ignore  $\mu$   
457 in Equation 1. Note that the above model is conceptually similar to an approach taken by Lynch et  
458 al. (1993) to model fitness change under mutational meltdown. We parametrized Equation 1 using  
459 our estimated selection parameters. Note that we estimated two classes of beneficial mutational  
460 effects for the two classes of functional elements. When parameterizing Equation 1, we summed  
461 the fitness contributions over the two classes of fitness effect inferred for each element. We  
462 calculated the ratio of  $\Delta W$  for protein-coding exons and CNEs ( $\Delta W_{Exons}/\Delta W_{CNEs}$ ) as a measure of  
463 the relative contributions of the two types of elements to adaptive evolution (which also implicitly  
464 assumes the same  $h$  for all classes of mutation).

465

466 Our point estimates suggest that  $\Delta W$  is larger for protein-coding regions than regulatory regions.  
467 However, it is notable that the total genomic rate of fixation of beneficial mutations is higher for  
468 CNEs than for coding regions (see also Halligan et al. 2013), but this reflects the fact that there are  
469 approximately three times as many CNE bases as non-synonymous bases in the mouse genome.  
470 Although the estimated genomic rate of fixation of beneficial mutations in CNEs is greater than  
471 that of protein-coding exons (Table 2), the average strength of selection acting on a new  
472 advantageous nonsynonymous mutation far exceeds that of CNEs (Table 2). Fitness change is  
473 proportional to the square of the effect size, so that the change in population mean fitness  
474 brought about by the fixation of advantageous mutations is substantially higher for protein-coding  
475 exons than for CNEs. This result is sensitive to the choice of recombination map, since we inferred  
476 stronger selection when assuming the LD-based map (Supplementary Table 3). Using a parametric  
477 bootstrap approach, we found that  $\Delta W_{Exons}/\Delta W_{CNEs}$  was significantly greater than 1 when using  
478 the LD-based map, but not when assuming the pedigree-based map of Cox et al. (2009).

479

480 **Table 2** Estimates of the change in fitness brought about by the fixation of advantageous  
481 mutations. Estimates were obtained assuming an effective populations size for *M. m. castaneus* of  
482 420,000 and the selection parameters shown in Table 1.

483

| Recombination Map                   | Element                      | $\Delta W_{Exons}/\Delta W_{CNEs}$ | 95% Bootstrap interval |
|-------------------------------------|------------------------------|------------------------------------|------------------------|
| LD-based<br>( <i>castaneus</i> map) | Protein-Coding Exons<br>CNEs | 23.11                              | 11.08 - 54.67          |
| Pedigree-based<br>(Cox et al. 2009) | Protein-Coding Exons<br>CNEs | 2.94                               | 0.211 - 46.36          |

484

485

486 Selective sweeps and background selection in the mouse genome

487 The profiles of nucleotide diversity indicate the existence of pervasive effects of selection on  
488 diversity across the genome (Figure 1, Figure 2). By fitting a model of sweeps to the troughs in  
489 diversity around protein-coding exons and CNEs, while assuming that the troughs are partly  
490 caused by BGS, we estimated the parameters of positively selected mutations occurring in the two  
491 classes of element. Our analysis suggests that regulatory sequences experience a higher genomic  
492 rate of newly arising advantageous mutations than protein-coding sites. However, the trough in  
493 diversity around exons is both deeper and wider than what is observed around CNEs, and,  
494 accordingly, we found that protein-coding regions experience more strongly selected mutations  
495 than regulatory sequences. Using a different approach, Campos et al. (2017) came to a similar  
496 conclusion for *D. melanogaster* by comparing UTRs with the coding sequences of genes.

497

498 Due to non-independence among the various *M. musculus* sub-species, we only estimated  
499 parameters of positive selection for *M. m. castaneus*, the sub-species with the highest levels of  
500 diversity. Our selection parameter estimates for *M. m. castaneus* are fairly similar to estimates  
501 obtained for European *M. m. domesticus* in an earlier study (Teschke et al. 2008).

502

503

504 Limitations and next steps

505 There are a number of caveats concerning our estimates of positive selection parameters. Firstly,  
506 we found that an exponential distribution of beneficial mutational effects provided a poorer fit to  
507 the troughs in diversity compared to a model with two discrete classes of effects (Supplementary  
508 File 3). However, the true DFE for advantageous mutations is almost certainly more complex than  
509 the simple models assumed. The approach used in this study was based on average nucleotide  
510 diversity across many sites, and we presumably had little power to infer a more complex model of  
511 the DFE for advantageous mutations. Secondly, we have assumed that all elements of a particular  
512 class share a common set of selection parameters. This is problematic, since CNEs could be  
513 composed of several categories, such as promoters and enhancers, which may be subject to  
514 different selective pressures. Indeed, different categories of protein-coding genes may also be  
515 subject to different selection pressures. For example, immunity genes in *D. melanogaster*, virus  
516 interacting proteins in humans and highly expressed genes in *Capsella grandiflora* appear to have  
517 higher rates of adaptive substitutions than the respective genome wide averages (Enard et al.  
518 2014; Obbard et al. 2009; Williamson et al. 2014). Thirdly, for a single class of advantageous  
519 mutational effects, under the assumption that there is no interference among sweeps, the  
520 predicted reductions in diversity caused by selective sweeps can be modelled as a simple  
521 hyperbolic function (Equation 4). However, if the rate of sweeps is sufficiently high, and the rate of  
522 recombination is sufficiently low, selective interference can cause the rate of sweeps to be lower  
523 than predicted by a given strength of selection (Campos and Charlesworth 2019). This implies that  
524 the strength of positive selection would be overestimated by our methods. A bias in the opposite  
525 direction, which is likely to be more important for genomic regions with normal levels of  
526 recombination, is caused by deviations from one of the assumptions underlying Equation 4, i.e.  
527 that there is full recovery of nucleotide diversity between selective sweeps (Campos and  
528 Charlesworth 2019; Charlesworth 2020). This would lead to the effects of sweeps to be  
529 underpredicted. Incorporating more sophisticated models of selective sweeps into the inference  
530 framework is a logical next step.

531

532 The architecture of functional elements in the mammalian genome is such that a single exon or  
533 CNE is rarely far away from another functional element. When estimating the effects of sweeps on  
534 neutral diversity, we excluded all putatively functional sites from our analysis windows, but  
535 multiple linked elements may affect observed diversity at a given locus. For this reason, we did not

536 estimate the strength of positive selection acting on UTRs, although sweeps in these elements are  
537 also likely to contribute to heterogeneity in  $\pi$  across the mouse genome, as has been found in *D.*  
538 *melanogaster* (Campos et al. 2017). The model fitted to the troughs in diversity assumes that  
539 selection is generated by a single, idealised exon or CNE. However, there is variation in the length  
540 of exons and CNEs across the genome. An analysis that models genome-wide heterogeneity in  
541 diversity while taking into account the locations of individual functional elements, similar to the  
542 method developed by Elyashiv et al. (2016) for *D. melanogaster*, could be a more powerful  
543 approach. Note that the approach of Elyashiv et al. (2016) might not be applicable in all situations,  
544 because it conditions the effects of sweeps on the locations of recent substitutions. In mice and  
545 humans, patterns of diversity around nonsynonymous substitutions are indistinguishable from the  
546 patterns of diversity around synonymous substitutions (Hernandez et al. 2011; Halligan et al.  
547 2013). Developing a chromosome-wide analysis that conditions the effects of sweeps on the  
548 locations of genomic elements rather than substitutions may be a useful avenue for further  
549 research.

550  
551 The model of sweeps we assumed involves positive selection acting on *de novo* mutations – the  
552 so-called 'hard', or 'classic' sweep model. Studies in humans and *Drosophila* have, however,  
553 suggested that 'soft' sweeps are common (Garud et al. 2015; Garud and Petrov 2016; Schrider and  
554 Kern 2016; but see Harris et al. 2018). Soft selective sweeps occur when advantageous alleles  
555 present in multiple copies in the population spread to fixation, which can occur if selection acts on  
556 standing genetic variation or if multiple copies of the selected allele arise independently  
557 (Hermisson and Pennings 2017). Additionally, adaptation acting on quantitative traits subject to  
558 stabilising selection may generate partial sweeps, because changes in allele frequencies at many  
559 loci can rapidly alter mean phenotypes, without necessarily causing fixations (Pritchard et al. 2010;  
560 Jain and Stephan 2017). The profiles of the reductions in diversity around soft and partial sweeps  
561 differ from those expected under hard sweeps, and if either of the alternative types of sweep  
562 were common, the assumption of a hard sweep model could result in spurious parameter  
563 estimates (Elyashiv et al. 2016). Finally, the trough in diversity around a selective sweep in a  
564 structured population is expected to be shallower than in a panmictic population because of the  
565 longer time taken to reach fixation (Barton 2000; Santiago and Caballero 2005). If beneficial alleles  
566 are frequently introduced via migration, we may therefore underestimate the strength of  
567 selection.

568

569 Finally, it is important to note that CNEs are generally expected to represent regulatory sequences  
570 that are deeply conserved. It has been demonstrated that the evolution of regulatory elements is  
571 more dynamic than that of coding sequences, with major gains of new regulatory elements having  
572 occurred in vertebrate and mammalian evolution (Mikkelsen et al. 2007; Lowe et al. 2011). If more  
573 recently acquired regulatory elements, which may be absent from the CNE dataset, experience  
574 stronger or more frequent adaptive substitutions, it is possible that we have underestimated the  
575 contribution of regulatory changes to adaptive evolution. For instance, a recent gain of a new  
576 regulatory element might have been caused by relatively strong positive selection acting on the  
577 element as a whole, resulting in a single sweep event. This would fall outside the inference  
578 framework developed here.

579  
580 It seems likely that adaptation does not fit any one particular mode, but rather different functional  
581 elements will be subject to a mixture of different types of sweep that may vary depending on the  
582 genomic region. For example, adaptation may more commonly act on standing variation in  
583 regulatory regions simply because they harbour greater nucleotide diversity than nonsynonymous  
584 sites (Figure 2).

585

## 586 Conclusions

587

588 In this study, we have shown that multiple wild mouse taxa exhibit patterns of genetic diversity  
589 and divergence that are consistent with the action of natural selection. Furthermore, we have  
590 shown that strong positive selection can explain the dips in diversity around protein-coding exons  
591 and CNEs in *M. m. castaneus*. Finally, even though the framework we have adopted here is  
592 incapable of distinguishing different modes of positive selection such as adaptation, sexual  
593 selection and various forms of competition, the estimated parameters of positive selection  
594 suggest that mutations in protein-coding regions may contribute more to the rate of change in  
595 fitness under positive selection than regulatory mutations.

596



## 597 Materials and Methods

### 598 Genomic data

599 We re-analysed previously published genome sequences for the 54 wild-caught *Mus musculus*  
600 individuals described in Harr et al. (2016) and the 10 *M. m. castaneus* individuals and the *M.*  
601 *famulus* individual originally described in Halligan et al. (2010, 2013). The mouse samples  
602 belonged to three species: *Mus spretus*, *Mus musculus* and *Mus famulus*. The *M. spretus*  
603 individuals ( $n = 8$ ) were from Madrid, Spain. The *M. musculus* individuals are composed of samples  
604 from the sub-species *M. m. domesticus*, *M. m. musculus* and *M. m. castaneus*. Three populations  
605 of *M. m. domesticus* were sampled (Massif Central, France,  $n = 8$ ; Cologne-Bonn, Germany,  $n = 8$ ;  
606 Ahvaz, Iran,  $n = 8$ ) and three populations of *M. m. musculus* were sampled (Afghanistan,  $n = 6$ ;  
607 Studenec, Czech Republic,  $n = 8$ ; Mazar-e-Sharif, Kazakhstan,  $n = 8$ ). We also analysed 10 *M. m.*  
608 *castaneus* described by Halligan et al. (2010, 2013), sampled in Himachal Pradesh, India. The one  
609 *M. famulus* individual, originated in Southern India, though Halligan et al. (2013) obtained it from  
610 the Montpellier Wild Mice Repository.

611  
612 Harr et al. (2016) published and made available the variant calls obtained from the *M. musculus*  
613 samples described above in the form of VCF files. However, Harr et al. (2016) did not include  
614 invariant sites in their VCFs; for our purposes we required this information, so we re-called  
615 variants from their processed BAM files, available at  
616 <http://wwwuser.gwdg.de/~evolbio/evolgen/wildmouse/>. The data had been processed according  
617 to the GATK version 3 best practices pipeline, up to the step prior to variant calling. Briefly, all  
618 sequencing reads had been mapped to the *mm10* genome using *bwa-mem* (Li 2013). Reads were  
619 then sorted, merged and PCR duplicates were marked using *picardtools*  
620 (<https://broadinstitute.github.io/picard/>). Base Quality Score Recalibration was then applied using  
621 the dbSNP resource for mice (<https://www.ncbi.nlm.nih.gov/snp>) to produce analysis-ready  
622 alignments in BAM format. We generated BAM files for the *M. m. castaneus* data and the *M.*  
623 *famulus* mice using the same procedure using FASTQ files downloaded from the European  
624 Nucleotide Archive (accession number PRJEB2176). For each of the mice, we called variants  
625 separately using the HaplotypeCaller tool from GATK3.7 (McKenna et al. 2010), with the options  
626 “–emitRefConfidence BP\_RESOLUTION –max-alternate-alleles 2”, and made population-specific

627 VCF files using the GATK tools *combineGVCFs* and *genotypeGVCFs*. We restricted all analyses to  
628 autosomal sites.

629

630 Outgroup information and CpG sites

631 In this study we used *M. famulus*, *Mus pahari* and *Rattus norvegicus* as the outgroup species. For  
632 each of the mouse taxa described above and each outgroup, we created a synthetic mm10-length  
633 reference genome by replacing mm10 alleles with the major allele of the variant call set. In  
634 addition, we constructed a synthetic genome for *R. norvegicus* by replacing mm10 alleles with the  
635 homologous positions in the rat genome using the UCSC reciprocal best alignments between rn6  
636 and mm10 (available at:

637 <ftp://hgdownload.cse.ucsc.edu/goldenPath/rn6/vsMm10/reciprocalBest/>) using custom Python

638 scripts. For an additional outgroup, more closely related to *Mus musculus* than the rat, we  
639 obtained the homologous alleles from *Mus pahari* at mm10 positions using the ENSEMBL pairwise  
640 alignments between the *M. pahari* reference sequence (Thybert et al. 2018) and mm10 (available  
641 at: [ftp://ftp.ensembl.org/pub/release-90/maf/ensembl-compara/pairwise\\_alignments/](ftp://ftp.ensembl.org/pub/release-90/maf/ensembl-compara/pairwise_alignments/)).

642

643 CpG sites have higher rates of spontaneous mutation than non-CpG sites, and identifying and  
644 excluding CpG-prone sites is a conservative way of reducing the impact of CpG hypermutability on  
645 analysis of population genomic data (Gaffney and Keightley 2008). For each of the rodent taxa, we  
646 used the synthetic mm10-length reference genomes to identify the locations of CpG-prone sites,  
647 defined as those sites in our synthetic references that were preceded by a C or followed by a G in  
648 the 5' or 3' direction, respectively. All analyses presented in this paper excluded CpG-prone sites.

649

650 Annotations and identifying conserved non-coding elements

651 We downloaded the list of mouse-rat orthologs from <https://www.ensembl.org/biomart/> and

652 extracted the annotations for each from version 38.93 of ENSEMBL

653 (*Mus\_musculus.GRCm38.93.gtf.gz*; Howe et al. 2021). For each of the orthologs, we identified the  
654 positions of 0-fold degenerate nonsynonymous and 4-fold degenerate synonymous sites using the  
655 synthetic genomes for each of the mouse taxa and the outgroups described above. The locations  
656 of 5' and 3' untranslated regions (UTRs) were retained for downstream analyses. We also retained  
657 a list of all exonic positions in the mouse genome, regardless of orthology, for the purposes of  
658 filtering out functionally constrained sites in downstream analyses.

659

660 There is evidence that synonymous sites within exonic splice enhancers (ESEs) in humans are  
661 subject to purifying selection, and that ignoring ESEs can bias analyses that rely on the assumption  
662 that synonymous sites evolve neutrally (Savisaar and Hurst 2018). Savisaar and Hurst (2018)  
663 identified putative ESEs by comparing human gene sequences against various lists of ESE motifs.  
664 They found that synonymous sites in regions matching ESE motifs had lower nucleotide diversity  
665 than those outside of putative ESEs. We identified the locations of potential ESEs in protein-coding  
666 genes orthologous between mice and rat using the merged list of ESEs described in Savisaar and  
667 Hurst (2018) (kindly provided by Rosina Savisaar). For each of the mouse-rat orthologs, we  
668 extracted the gene sequence and performed a string search against the list of ESE motifs. We  
669 recorded the genomic position of each region matching an ESE motif and used them to filter out  
670 the affected coding sites in downstream analysis.

671

672 We identified conserved non-coding elements (CNEs) in murid rodents using a 40-way alignment  
673 of placental mammals downloaded from UCSC  
674 (<http://hgdownload.cse.ucsc.edu/goldenPath/mm10/multiz60way/>). To avoid ascertainment bias,  
675 the mouse and rat genomes in the 40-way alignment were converted to the character “N” prior to  
676 calling conserved elements, following Williamson et al. (2014). We ran *phastCons* with the  
677 following arguments `--expected-length=45 --target-coverage=0.3 --rho=0.31`. To identify CNEs, we  
678 masked all exonic regions from the resulting file of *phastCons* elements using the complete list of  
679 annotations from the 38.93 database (see above). The scripts and full pipeline used to identify  
680 CNEs are available at [https://github.com/rorycraig337/mouse\\_mm10\\_conserved\\_elements](https://github.com/rorycraig337/mouse_mm10_conserved_elements).

681

682 For each CNE identified in this way, we obtained the location of their flanking sequences, which  
683 we used as neutral comparators in downstream analysis. For each CNE, we recorded the locations  
684 of two loci of equal length upstream and downstream of the focal element, offset by 500bp. We  
685 merged overlapping CNE-flanks and masked out sites that overlapped any CNE or exonic sites.

686

687 We analysed the mouse genomes assuming the pedigree-based genetic map of *Mus musculus*  
688 constructed by Cox et al. (2009). The Cox map was constructed using data from 3,546 meioses  
689 observed in crosses of common laboratory strains. The markers genotyped by Cox et al. (2009)  
690 were mapped to the mm9 reference genome, but in the present study we converted the mm9  
691 coordinates to mm10 positions as follows. The Cox map was downloaded from the Jackson

692 Laboratory website (<http://cgd.jax.org/mousemapconverter/>). The SNP positions of the Cox map  
693 were then extracted and converted to mm10 positions using the online UCSC LiftOver tool  
694 (<https://genome.ucsc.edu/cgi-bin/hgLiftOver>). The physical distances between the mm10 SNP  
695 positions were then converted to units of genetic distance using the Jackson Laboratory's  
696 conversion tool (<http://cgd.jax.org/mousemapconverter/>). We also analysed the mouse genomes  
697 using an LD-based recombination map inferred from the sample of *M. m. castaneus* individuals, as  
698 described in the Appendix.

699

700 Mouse analysis – Patterns of nucleotide diversity around selected sites

701 For each of the *M. musculus* sub-species and *Mus spretus*, we examined patterns of nucleotide  
702 diversity around protein-coding exons and CNEs. From the edges of protein-coding exons (CNEs),  
703 polymorphism data and divergence from the rn6 rat reference genome were extracted in windows  
704 of 1Kbp (100bp) extending to distances of 100Kbp (5Kbp). Analysis windows only extended to the  
705 midway point between adjacent elements. Sites within the exons of protein-coding genes or CNEs  
706 were excluded from analysis windows. The genetic distance between an analysis window and a  
707 focal element was calculated either from the pedigree-based genetic map constructed using  
708 common lab strains of *M. musculus* (Cox et al. 2009) or the linkage disequilibrium (LD) based  
709 recombination map for *M. m. castaneus*. The SFS and divergence from were recorded for each  
710 analysis window. Analysis windows were then binned based on the genetic distance from the focal  
711 element, and the SFS and divergence from individual windows were collated. Because LD-based  
712 and pedigree-based recombination maps have different features and shortcomings (see Results),  
713 we performed analyses based on both genetic maps.

714

715 Estimating the unfolded site frequency spectrum, summary statistics and the  
716 distribution of fitness effects

717 We analysed genetic variation for five different classes of sites in the genome, i.e. the 0-fold and 4-  
718 fold degenerate sites and UTRs of protein-coding genes, CNEs and CNE-flanks. For each class of  
719 sites, we inferred the unfolded site frequency spectrum (uSFS), which is the distribution of derived  
720 allele frequencies in the mouse samples. The uSFS was inferred by maximum likelihood using the  
721 two-outgroup method of Keightley and Jackson (2018) using *Mus famulus* and *Mus pahari* as  
722 outgroups. We compared the fit of 1-, 2- and 6- parameter mutation rate models using *est-sfs*  
723 (v2.03; Keightley and Jackson 2018). Consistently, a model with 6 mutation rate parameters (i.e.

724 the R6 model from Keightley and Jackson 2018) provided the best fit to the data (as judged by  
725 model likelihoods), but the uSFS and lineage specific divergences that were estimated under the 2-  
726 parameter and 6-parameter models were almost identical in all cases (Supplementary File 1), so  
727 we have used the results from the 2-parameter model in our analyses for all taxa. For each taxon  
728 and class of sites, we performed 100 bootstraps, sampling genes or CNEs with replacement. We  
729 inferred the uSFS for each bootstrapped dataset as above. For each class of sites, we calculated  
730 nucleotide diversity ( $\pi$ ) and Tajima's  $D$  from the inferred uSFS for each bootstrap sample.

731

732 Estimates of the distribution of fitness effects (DFE) were obtained by analysing the unfolded site  
733 frequency spectrum for each class of functional site using *polyDFE* v2 (Tataru and Bataillon 2019).  
734 For 0-fold sites and UTRs, we used 4-fold degenerate synonymous sites as the neutral comparator,  
735 and for CNEs we used CNE-flanks. Using *polyDFE2*, we fitted a gamma distribution of deleterious  
736 mutations effects and a single class of beneficial mutations (using the -model B option). We  
737 excluded between species divergence from the analysis using the "-w" option. We fitted the uSFS  
738 data for each of the bootstrap replicates described above.

739

#### 740 Simulating background selection

741 There is substantial evidence that background selection (BGS) contributes to troughs in diversity  
742 around protein-coding exons and CNEs (Halligan et al. 2013; Booker and Keightley 2018). For our  
743 analysis, we therefore required estimates of the effect of BGS on neutral diversity,  $B$ , at varying  
744 distances from functional elements. Estimates of  $B$  were included as covariates when fitting a  
745 model of selection at linked sites. However, when purifying selection is weak ( $\gamma_d < 5$ ) analytical  
746 formulae for calculating  $B$  over-predict the effects of BGS (Gordo et al. 2002; Good et al. 2014),  
747 and weakly deleterious mutations appear to comprise a large fraction of the DFEs for mice (Figure  
748 3 and Halligan et al. 2013). We therefore opted to obtain estimates of the variation in  $B$  from  
749 forward-in-time simulations that modelled the entire range of fitness effects inferred for mice.

750

751 We used *SLiM* v3.2 (Haller and Messer 2019) for this purpose. Following Booker and Keightley  
752 (2018), we incorporated the actual distribution of functional elements (the coding exons and UTRs  
753 of protein-coding genes, and CNEs) and the estimated recombination rates. 1 Mbp regions of the  
754 mouse genome were randomly sampled and the functional annotations in the sampled regions  
755 were used as the basis of a simulation replicate. The parameters of the gamma distributions of  
756 fitness effects for deleterious mutations estimated for 0-fold sites, UTRs and CNEs were used in

757 the simulations for the respective elements. The recombination rate variation present in the  
758 sampled region of the mouse genome was included in the simulations using either the pedigree-  
759 based map from Cox et al. (2009) or the LD-based recombination map for *M. m. castaneus*. When  
760 assuming the Cox map, the recombination rates (in units of cM/Mbp) were scaled in the  
761 simulations by a factor of  $420r$ , assuming  $N_e = 420,000$  for wild *M. m. castaneus*. In the case of the  
762 LD-based estimates of the recombination rate, population-scaled recombination rates (in units of  
763  $4N_e r$ ) were simply divided by  $4N$ , where  $N$  was the simulated population size. Populations of  $N =$   
764 1,000 diploid individuals were simulated for 20,000 generations. We set the mutation rate such  
765 that the neutral expectation  $\pi_0 = 4N_e\mu = 0.01$ , based on the upper estimate of nucleotide diversity  
766 observed in the *M. m. castaneus* genome (Figure 1). Given the simulated population size of 1,000  
767 diploids,  $4N_e\mu = 0.01$  corresponded to a point mutation rate of  $\mu = 2.5 \times 10^{-6}$ . We used the tree-  
768 sequence recording option in *SLiM* to record the genealogies of the simulated populations, so  
769 modelling neutral mutations in *SLiM* was not required. Instead, neutral mutations were added to  
770 the recorded coalescent trees at a rate  $\mu$  using *PySLiM*  
771 (<https://pyslim.readthedocs.io/en/latest/introduction.html>). We sampled 200 haploid  
772 chromosomes from the population and extracted  $B = \pi/\pi_0$  as a function of genetic distance from  
773 both protein-coding exons and CNEs. Data were extracted from the simulated populations in the  
774 same way as for the empirical data. To obtain smoothed  $B$  values, we fitted LOESS curves to the  
775 average  $\pi$  observed around functional elements in the simulated data. We fitted LOESS curves  
776 using a span parameter of 0.3 and the number of sites contributing to each analysis bin as weights  
777 in R (v3.4.2).

## 778 Model of recurrent selective sweeps and background selection

780 Our analysis is a modification of that of Elyashiv et al. (2016) and Campos et al. (2017), where  
781 expressions were described for the neutral diversity expected under the combined effects of BGS  
782 and sweeps. Consider a haplotype with a set of neutral sites linked to a site that is the target of  
783 positive selection. A new, semi-dominant advantageous mutation with heterozygous selection  
784 coefficient  $s_a$  occurs at site  $i$  on the haplotype and spreads to fixation. Recombination between  
785 sites  $i$  and  $k$  uncouples the neutral and selected sites at rate  $r_{i,k}$  per generation. The expected  
786 change in neutral diversity at site  $k$  ( $\Delta\pi_k$ ), relative to its expectation in the absence of selection ( $\pi_0$ )  
787 is given by

$$788 \frac{\Delta\pi_k}{\pi_0} = -(4N_e s_a)^{\frac{-2r_{i,k}}{s_a}}. \quad (2)$$

789

790 See Barton (2000), Charlesworth and Charlesworth (2010, p411) or Campos and Charlesworth  
791 (2019) for derivations of Equation 2. This approximation assumes that selection pressure on the  
792 advantageous allele satisfies  $N_e s_a \gg 1$ , so that the sweep can be treated deterministically  
793 following an initial stochastic establishment phase. Under this assumption, the quantity  $-\Delta\pi_k$  in  
794 Equation 1 can be equated to the probability of a sweep-induced coalescent event at site  $k$  (Wiehe  
795 and Stephan 1993). For a particular class of functional elements (e.g. protein-coding exons),  
796 sweeps occur at a rate of  $V_a = 2\mu p_a \gamma_a$  per nucleotide per generation (Kimura and Ohta 1971),  
797 where  $\mu$  is the mutation rate per nucleotide site,  $p_a$  is the proportion of new mutations that are  
798 advantageous and  $\gamma_a$  is the scaled selection coefficient ( $4N_e s_a$ ) for these mutations. If  $V_a$  is  
799 sufficiently low, such that sweeps do not interfere with each other, the total probability of sweep-  
800 induced coalescence for a neutral site caused by selection at a linked functional element is:

801

$$802 \quad P_{sc,k} = V_a \tau \gamma_a^{\frac{-2r_{i,k}}{s_a}}, \quad (3)$$

803

804 where  $\tau$  is the number of sites in a particular class of functional element. In our analysis of data  
805 from wild mice,  $r_{i,k}$  was measured from the end of a functional element to the centre of an analysis  
806 window.

807

808 The effects of background selection at site  $k$  can be represented by multiplying the effective  
809 population size by a factor  $B_k$ . The probability of coalescence for a neutral allele affected by BGS is  
810 thus  $1/(2B_k N_e)$ . We assume that coalescent events caused by BGS and sweeps follow independent  
811 exponential distributions, so that the rate of coalescence induced by the two processes is the sum  
812 of  $1/(2B_k N_e)$  and  $P_{sc,k}$ . We also multiply the sweep effect  $P_{sc,k}$  by  $B_k$  to reflect the reduction in the  
813 fixation probability of a new advantageous mutation as a result of the reduction in  $N_e$  caused by  
814 BGS, following Kim and Stephan (2000). Simulations show that this may overestimate the effect of  
815 BGS on fixation probabilities (Campos and Charlesworth 2019), we thus compared selection  
816 parameters with and without including background selection.

817

818 Writing the reciprocal of the rate of coalescence at the neutral site under the combined effects of  
819 BGS and sweeps as  $T_k$  (which is equivalent to the expected time to coalescence of a pair of alleles),  
820 and expressing it relative to the expected time to coalescence under neutrality ( $T_0$ ), we have:

821

822

$$\frac{T_k}{T_0} \approx \frac{\pi_k}{\pi_0} \approx \frac{1}{B_k^{-1} + 2N_e B_k P_{sc,k}}. \quad (4)$$

823

824 We estimated parameters of advantageous mutations by fitting Equation 4 to the relationship  
825 between nucleotide diversity and genetic distance from functional elements, using non-linear  
826 least squares with the *lmfit* (v0.9.7) package for Python 2.7. When modelling a single class of  
827 fitness effects, we estimated  $\gamma_a$  and  $p_a$  using Equation 4. To incorporate two discrete classes of  
828 advantageous mutational effects, we modified Equation 4, replacing  $P_{sc,k}$  in Equation 4 with

829

$$P_{sc,k} = V_{a,2} \tau \gamma_{a,2}^{\frac{-2r_{i,k}}{s_{a,2}}} + V_{a,1} \tau \gamma_{a,1}^{\frac{-2r_{i,k}}{s_{a,1}}}, \quad (5)$$

831

832 where the subscripts 1 and 2 refer to the two different classes of fitness effects.

833

834 To model an exponential distribution of fitness effects, we replaced  $P_{sc,k}$  with

835

$$P_{sc,k} = \int_0^\infty V_a \tau \gamma_a^{\frac{-2r_{i,k}}{s_a}} \phi(\gamma_a | \bar{\gamma}_a) d\gamma_a, \quad (6)$$

837

838 where  $\phi(\gamma_a | \bar{\gamma}_a)$  is the probability density function of an exponential distribution with mean  $\bar{\gamma}_a$ . In  
839 all cases, we used the average length of protein-coding exons or CNEs, 152.0 and 50.0  
840 respectively, as  $\tau$  when fitting equation 4. We assumed that  $N_e = 426,200$ , based on  $4N_e\mu = 0.0092$   
841 and a mutation rate of  $5.4 \times 10^{-9}$  (Uchimura et al. 2015).

842

843 We used our estimates of positive selection parameters to quantify the relative contributions of  
844 positive selection in protein-coding exons versus CNEs to the change in population mean fitness.  
845 To obtain confidence intervals around our estimates of the ratio of fitness contributed by positive  
846 selection in exons versus CNEs ( $\Delta W_{Exons} / \Delta W_{CNEs}$ ), we used a parametric bootstrap approach. For  
847 each estimated  $\gamma_a$  and  $p_a$  parameter, we sampled random values from a truncated normal  
848 distribution with mean equal to the parameter estimate and variance equal to the square of the  
849 standard error of the parameter estimate. The truncated normal distribution had a lower bound of  
850 0.0, since values of  $\gamma_a$  and  $p_a$  below 0 are biologically impossible. For the calculation of  $\Delta W_{Exons} /$   
851  $\Delta W_{CNEs}$ , we performed 1,000 bootstraps and used them to estimate 95% confidence intervals.



852

853 Data availability

854 Scripts and code to reproduce all analyses, simulations and figures shown in this study are  
855 available at <https://github.com/TBooker/MuridRodentProject>.

856

## 857 Author Contributions

858 TRB, BC and PDK devised the study. TRB, BCJ, RJC analysed the data. TRB wrote the first draft of  
859 the manuscript. All authors contributed to the writing and editing of the manuscript.

860

## 861 Acknowledgements

862 We would like to extend thanks to Rosina Savisaar for help with identifying exonic splice  
863 enhancers and to Peter Ralph for help with PySlim. We would also like to thank Sally Otto, Michael  
864 Whitlock, Nathaniel Sharp and Armando Geraldes for helpful discussions, and especially Dan  
865 Halligan for help and guidance throughout the course of this and the preceding projects. This  
866 project has received funding from the European Research Council under the European Union's  
867 Horizon 2020 research and innovation programme (grant agreement no. 694212).

868

## 869 References

- 870 Barton, N. H. (2000). Genetic hitchhiking. *Philos Trans R Soc Lond B Biol Sci*, 355(1403), 1553–1562.  
871 <https://doi.org/10.1098/rstb.2000.0716>
- 872 Booker, T R, Ness, R. W., & Keightley, P. D. (2017). The recombination landscape in wild house  
873 mice inferred using population genomic data. *Genetics*, 207(1), 297–309.  
874 <https://doi.org/10.1534/genetics.117.300063>
- 875 Booker, Tom R. (2020). Inferring Parameters of the Distribution of Fitness Effects of New  
876 Mutations When Beneficial Mutations Are Strongly Advantageous and Rare. *G3*, 10(7), 2317–  
877 2326. <https://doi.org/10.1534/g3.120.401052>
- 878 Booker, Tom R, & Keightley, P. D. (2018). Understanding the Factors That Shape Patterns of  
879 Nucleotide Diversity in the House Mouse Genome. *Molecular Biology and Evolution*, 35(12),  
880 2971–2988.
- 881 Campos, J L, Zhao, L., & Charlesworth, B. (2017). Estimating the parameters of background  
882 selection and selective sweeps in *Drosophila* in the presence of gene conversion. *Proceedings*  
883 *of the National Academy of Sciences*, 114(24), E4762–E4771.  
884 <https://doi.org/10.1073/pnas.1619434114> 10.5061/dryad.vs264)
- 885 Campos, José Luis, & Charlesworth, B. (2019). The effects on neutral variability of recurrent  
886 selective sweeps and background selection. *Genetics*, 212(1), 287–303.  
887 <https://doi.org/10.1534/genetics.119.301951>
- 888 Carroll, S. B. (2005). Evolution at two levels: on genes and form. *PLoS Biology*, 3(7), e245.  
889 <https://doi.org/10.1371/journal.pbio.0030245>
- 890 Chan, A. H., Jenkins, P. A., & Song, Y. S. (2012). Genome-wide fine-scale recombination rate  
891 variation in *Drosophila melanogaster*. *PLoS Genetics*, 8(12), e1003090.  
892 <https://doi.org/10.1371/journal.pgen.1003090>
- 893 Charlesworth, B, & Charlesworth, D. (2010). *Elements of Evolutionary Genetics*. Roberts \&  
894 Company.
- 895 Charlesworth, Brian. (2012). The effects of deleterious mutations on evolution at linked sites.  
896 *Genetics*, 190(1), 5–22. <https://doi.org/10.1534/genetics.111.134288>
- 897 Charlesworth, Brian. (2020). How good are predictions of the effects of selective sweeps on levels  
898 of neutral diversity? *Genetics*, 216(4), 1217–1238.  
899 <https://doi.org/10.1534/genetics.120.303734>
- 900 Clark, A. G., Wang, X., & Matisse, T. (2010). Contrasting Methods of Quantifying Fine Structure of

- 901 Human Recombination. *Annual Review of Genomics and Human Genetics*, *11*(1), 45–64.  
902 <https://doi.org/10.1146/annurev-genom-082908-150031>
- 903 Comeron, J. (2014). Background selection as a baseline for nucleotide variation across the  
904 *Drosophila* genome. *PLoS Genetics*, *10*(6). <https://doi.org/10.1371/>
- 905 Cox, A., Ackert-Bicknell, C. L., Dumont, B. L., Ding, Y., Bell, J. T., Brockmann, G. A., Wergedal, J. E.,  
906 Bult, C., Paigen, B., Flint, J., Tsaih, S. W., Churchill, G. A., & Broman, K. W. (2009). A new  
907 standard genetic map for the laboratory mouse. *Genetics*, *182*(4), 1335–1344.  
908 <https://doi.org/10.1534/genetics.109.105486>
- 909 Delaneau, O., Howie, B., Cox, A. J., Zagury, J. F., & Marchini, J. (2013). Haplotype estimation using  
910 sequencing reads. *Am J Hum Genet*, *93*(4), 687–696.  
911 <https://doi.org/10.1016/j.ajhg.2013.09.002>
- 912 Dumont, B. L., & Payseur, B. A. (2011). Genetic analysis of genomic-scale recombination rate  
913 evolution in house mice. *PLoS Genetics*, *7*(6), 11. <https://doi.org/10.1371/>
- 914 Elyashiv, E., Sattath, S., Hu, T. T., Strutsosky, A., McVicker, G., Andolfatto, P., Coop, G., & Sella, G.  
915 (2016). A genomic map of the effects of linked selection in *Drosophila*. *PLoS Genetics*, *12*(8),  
916 e1006130. <https://doi.org/10.1371/journal.pgen.1006130>
- 917 Enard, D., Messer, P. W., & Petrov, D. A. (2014). Genome-wide signals of positive selection in  
918 human evolution. *Genome Research*, *24*(6), 885–895. <https://doi.org/10.1101/gr.164822.113>
- 919 Ewing, G. B., & Jensen, J. D. (2016). The consequences of not accounting for background selection  
920 in demographic inference. *Molecular Ecology*, *25*(1), 135–141.  
921 <https://doi.org/10.1111/mec.13390>
- 922 Falconer, D. S., & Mackay, T. F. C. (1996). *Introduction to Quantitative Genetics (Fourth Edition)*  
923 (Fourth). Pearson Education Limited.
- 924 Fisher, R. A. (1918). The Correlation Between Relatives on the Supposition of Mendelian  
925 Inheritance. *Transactions of the Royal Society of Edinburgh*, *52*, 399–433.
- 926 Gaffney, D. J., & Keightley, P. D. (2008). Effect of the assignment of ancestral CpG state on the  
927 estimation of nucleotide substitution rates in mammals. *BMC Evol Biol*, *8*, 265.  
928 <https://doi.org/10.1186/1471-2148-8-265>
- 929 Garud, N. R., Messer, P. W., Buzbas, E. O., & Petrov, D. A. (2015). Recent selective sweeps in North  
930 American *Drosophila melanogaster* show signatures of soft sweeps. *PLoS Genetics*, *11*(2),  
931 e1005004. <https://doi.org/10.1371/journal.pgen.1005004>
- 932 Garud, N. R., & Petrov, D. A. (2016). Elevated linkage disequilibrium and signatures of soft sweeps  
933 are common in *Drosophila melanogaster*. *Genetics*, *203*(2), 863–880.

- 934 <https://doi.org/10.1534/genetics.115.184002>
- 935 Geraldts, A., Basset, P., Smith, K. L., & Nachman, M. W. (2011). Higher differentiation among  
936 subspecies of the house mouse (*Mus musculus*) in genomic regions with low recombination.  
937 *Molecular Ecology*, *20*(22), 4722–4736. <https://doi.org/10.1111/j.1365-294X.2011.05285.x>
- 938 Good, B. H., Walczak, A. M., Neher, R. A., & Desai, M. M. (2014). Genetic Diversity in the  
939 Interference Selection Limit. *PLoS Genetics*, *10*(3).  
940 <https://doi.org/10.1371/journal.pgen.1004222>
- 941 Gordo, I., Navarro, A., & Charlesworth, B. (2002). Muller's Ratchet and the Pattern of Variation at a  
942 Neutral Locus. *Genetics*, *161*, 835–848.
- 943 Haldane, J. B. S. (1927). A Mathematical Theory of Natural and Artificial Selection, Part V: Selection  
944 and Mutation. *Mathematical Proceedings of the Cambridge Philosophical Society*, *23*(7), 838–  
945 844. <https://doi.org/10.1017/S0305004100015644>
- 946 Haller, B. C., & Messer, P. W. (2019). SLiM 3: Forward Genetic Simulations Beyond the Wright-  
947 Fisher Model. *Molecular Biology and Evolution*, *36*(3), 632–637.
- 948 Halligan, D. L., Kousathanas, A., Ness, R. W., Harr, B., Eory, L., Keane, T. M., Adams, D. J., &  
949 Keightley, P. D. (2013). Contributions of protein-coding and regulatory change to adaptive  
950 molecular evolution in murid rodents. *PLoS Genetics*, *9*(12), e1003995.  
951 <https://doi.org/10.1371/journal.pgen.1003995>
- 952 Halligan, D. L., Oliver, F., Eyre-Walker, A., Harr, B., & Keightley, P. D. (2010). Evidence for pervasive  
953 adaptive protein evolution in wild mice. *PLoS Genetics*, *6*(1), e1000825.  
954 <https://doi.org/10.1371/journal.pgen.1000825>
- 955 Harr, B., Karakoc, E., Neme, R., Teschke, M., Pfeifle, C., Pezer, Ž., Babiker, H., Linnenbrink, M.,  
956 Montero, I., Scavetta, R., Abai, M. R., Molins, M. P., Schlegel, M., Ulrich, R. G., Altmüller, J.,  
957 Franitza, M., Büntge, A., Künzel, S., & Tautz, D. (2016). Genomic resources for wild  
958 populations of the house mouse, *Mus musculus* and its close relative *Mus spretus*. *Scientific*  
959 *Data*, *3*. <https://doi.org/10.1038/sdata.2016.75>
- 960 Harris, R. B., Sackman, A., & Jensen, J. D. (2018). On the unfounded enthusiasm for soft selective  
961 sweeps II: Examining recent evidence from humans, flies, and viruses. *PLoS Genetics*, *14*(12),  
962 e1007859. <https://doi.org/10.1371/journal.pgen.1007859>
- 963 Hermisson, J., & Pennings, P. S. (2017). Soft sweeps and beyond: understanding the patterns and  
964 probabilities of selection footprints under rapid adaptation. *Methods in Ecology and*  
965 *Evolution*, *8*(6), 700–716. <https://doi.org/10.1111/2041-210x.12808>
- 966 Hernandez, R. D., Kelly, J. L., Elyashiv, E., Melton, S. C., Auton, A., McVean, G., Project, 1000

- 967 Genomes, Sella, G., & Przeworski, M. (2011). Classic selective sweeps were rare in recent  
968 human evolution. *Science*, *331*, 920–924.
- 969 Hoekstra, H. E., & Coyne, J. A. (2007). The locus of evolution: Evo devo and the genetics of  
970 adaptation. *Evolution*, *61*(5), 995–1016. <https://doi.org/10.1111/j.1558-5646.2007.00105.x>
- 971 Howe, K. L., Achuthan, P., Allen, J., Allen, J., Alvarez-Jarreta, J., Ridwan Amode, M., Armean, I. M.,  
972 Azov, A. G., Bennett, R., Bhai, J., Billis, K., Boddu, S., Charkhchi, M., Cummins, C., da Rin  
973 Fioretto, L., Davidson, C., Dodiya, K., El Houdaigui, B., Fatima, R., ... Flicek, P. (2021). Ensembl  
974 2021. *Nucleic Acids Research*, *49*(D1), D884–D891. <https://doi.org/10.1093/nar/gkaa942>
- 975 Jain, K., & Stephan, W. (2017). Rapid adaptation of a polygenic trait after a sudden environmental  
976 shift. *Genetics*, *206*(1), 389–406.
- 977 Johri, P., Riall, K., Becher, H., Excoffier, L., Charlesworth, B., & Jensen, J. D. (2021). The Impact of  
978 Purifying and Background Selection on the Inference of Population History: Problems and  
979 Prospects. *Molecular Biology and Evolution*. <https://doi.org/10.1093/molbev/msab050>
- 980 Keightley, P. D., & Jackson, B. C. (2018). Inferring the Probability of the Derived vs. the Ancestral  
981 Allelic State at a Polymorphic Site. *Genetics*, *209*(3), 897–906.
- 982 Kern, A. D., & Hahn, M. W. (2018). The neutral theory in light of natural selection. *Molecular  
983 Biology and Evolution*, *35*(6), 1366–1371. <https://doi.org/10.1093/molbev/msy092>
- 984 Kim, Y., & Stephan, W. (2000). Joint effects of genetic hitchhiking and background selection on  
985 neutral variation. *Genetics*, *155*, 1415–1427.
- 986 Kimura, M., & Ohta, T. (1971). *Theoretical aspects of population genetics*. Princeton Univ. Press.
- 987 King, M.-C., & Wilson, A. C. (1975). Evolution at two levels in humans and chimpanzees. *Science*,  
988 *188*(4184), 107–116.
- 989 Kousathanas, A., & Keightley, P. D. (2013). A comparison of models to infer the distribution of  
990 fitness effects of new mutations. *Genetics*, *193*(4), 1197–1208.  
991 <https://doi.org/10.1534/genetics.112.148023>
- 992 Lawal, R. A., Arora, U. P., & Dumont, B. L. (2021). Selection shapes the landscape of functional  
993 variation in wild house mice 1 2. *BioRxiv*, 2021.05.12.443838.  
994 <https://doi.org/10.1101/2021.05.12.443838>
- 995 Leffler, E. M., Bullaughey, K., Matute, D. R., Meyer, W. K., Segurel, L., Venkat, A., Andolfatto, P., &  
996 Przeworski, M. (2012). Revisiting an old riddle: what determines genetic diversity levels  
997 within species? *PLoS Biology*, *10*(9), e1001388. <https://doi.org/10.1371/journal.pbio.1001388>
- 998 Li, H. (2013). *Aligning sequence reads, clone sequences and assembly contigs with BWA-MEM*.  
999 <http://arxiv.org/abs/1303.3997>

- 1000 Lindblad-Toh, K., Garber, M., Zuk, O., Lin, M. F., Parker, B. J., Washietl, S., Kheradpour, P., Ernst, J.,  
1001 Jordan, G., Mauceli, E., Ward, L. D., Lowe, C. B., Holloway, A. K., Clamp, M., Gnerre, S., Alföldi,  
1002 J., Beal, K., Chang, J., Clawson, H., ... Sodergren, E. (2011). A high-resolution map of human  
1003 evolutionary constraint using 29 mammals. *Nature*, *478*(7370), 476–482.  
1004 <https://doi.org/10.1038/nature10530>
- 1005 Lowe, C. B., Kellis, M., Siepel, A., Raney, B. J., Clamp, M., Salama, S. R., Kingsley, D. M., Lindblad-  
1006 Toh, K., & Haussler, D. (2011). Three periods of regulatory innovation during vertebrate  
1007 evolution. *Science*, *333*(6045), 1019–1024. <https://doi.org/10.1126/science.1202702>
- 1008 Lynch, M., Bürger, R., Butcher, D., & Gabriel, W. (1993). The Mutational Meltdown in Asexual  
1009 Populations. *Journal of Heredity*, *84*(5), 339–344.  
1010 <https://doi.org/10.1093/oxfordjournals.jhered.a111354>
- 1011 McKenna, A., Hanna, M., Banks, E., Sivachenko, A., Cibulskis, K., Kernytsky, A., Garimella, K.,  
1012 Altshuler, D., Gabriel, S., Daly, M., & DePristo, M. A. (2010). The genome analysis toolkit: A  
1013 MapReduce framework for analyzing next-generation DNA sequencing data. *Genome*  
1014 *Research*, *20*(9), 1297–1303. <https://doi.org/10.1101/gr.107524.110>
- 1015 McVicker, G., Gordon, D., Davis, C., & Green, P. (2009). Widespread genomic signatures of natural  
1016 selection in hominid evolution. *PLoS Genetics*, *5*(5), e1000471.  
1017 <https://doi.org/10.1371/journal.pgen.1000471>
- 1018 Mikkelsen, T. S., Wakefield, M. J., Aken, B., Amemiya, C. T., Chang, J. L., Duke, S., Garber, M.,  
1019 Gentles, A. J., Goodstadt, L., Heger, A., Jurka, J., Kamal, M., Mauceli, E., Searle, S. M. J.,  
1020 Sharpe, T., Baker, M. L., Batzer, M. A., Benos, P. V., Belov, K., ... Lindblad-Toh, K. (2007).  
1021 Genome of the marsupial *Monodelphis domestica* reveals innovation in non-coding  
1022 sequences. *Nature*, *447*(7141), 167–177. <https://doi.org/10.1038/nature05805>
- 1023 Obbard, D. J., Welch, J. J., Kim, K. W., & Jiggins, F. M. (2009). Quantifying adaptive evolution in the  
1024 *Drosophila* immune system. *PLoS Genetics*, *5*(10), 1000698.  
1025 <https://doi.org/10.1371/journal.pgen.1000698>
- 1026 Paigen, K., Szatkiewicz, J. P., Sawyer, K., Leahy, N., Parvanov, E. D., Ng, S. H., Graber, J. H., Broman,  
1027 K. W., & Petkov, P. M. (2008). The recombinational anatomy of a mouse chromosome. *PLoS*  
1028 *Genetics*, *4*(7), e1000119. <https://doi.org/10.1371/journal.pgen.1000119>
- 1029 Pouyet, F., Aeschbacher, S., Thiéry, A., & Excoffier, L. (2018). Background selection and biased  
1030 gene conversion affect more than 95% of the human genome and bias demographic  
1031 inferences. *eLife*, *7*. <https://doi.org/10.7554/eLife.36317>
- 1032 Pritchard, J. K., Pickrell, J. K., & Coop, G. (2010). The genetics of human adaptation: hard sweeps,

- 1033 soft sweeps, and polygenic adaptation. *Current Biology*, 20(4), R208-15.
- 1034 <https://doi.org/10.1016/j.cub.2009.11.055>
- 1035 Santiago, E., & Caballero, A. (2005). Variation after a selective sweep in a subdivided population.
- 1036 *Genetics*, 169(1), 475–483. <https://doi.org/10.1534/genetics.104.032813>
- 1037 Sattath, S., Elyashiv, E., Kolodny, O., Rinott, Y., & Sella, G. (2011). Pervasive adaptive protein
- 1038 evolution apparent in diversity patterns around amino acid substitutions in *Drosophila*
- 1039 *simulans*. *PLoS Genetics*, 7(2), e1001302. <https://doi.org/10.1371/journal.pgen.1001302>
- 1040 Savisaar, R., & Hurst, L. D. (2018). Exonic splice regulation imposes strong selection at synonymous
- 1041 sites. *Genome Research*, 28(10), 1442–1454. <https://doi.org/10.1101/gr.233999.117>
- 1042 Schrider, D. R., & Kern, A. D. (2016). S/HIC: Robust Identification of Soft and Hard Sweeps Using
- 1043 Machine Learning. *PLoS Genetics*, 12(3), e1005928.
- 1044 <https://doi.org/10.1371/journal.pgen.1005928>
- 1045 Siepel, A., Bejerano, G., Pedersen, J. S., Hinrichs, A. S., Hou, M., Rosenbloom, K., Clawson, H.,
- 1046 Spieth, J., Hillier, L. D. W., Richards, S., Weinstock, G. M., Wilson, R. K., Gibbs, R. A., Kent, W.
- 1047 J., Miller, W., & Haussler, D. (2005). Evolutionarily conserved elements in vertebrate, insect,
- 1048 worm, and yeast genomes. *Genome Research*, 15(8), 1034–1050.
- 1049 <https://doi.org/10.1101/gr.3715005>
- 1050 Simonsen, K. L., Churchill, G. A., & Aquadro, C. F. (1995). Properties of statistical tests of neutrality
- 1051 for DNA polymorphism data. *Genetics*, 141(1).
- 1052 Stephan, W. (2019). Selective sweeps. *Genetics*, 211(1), 5–13.
- 1053 <https://doi.org/10.1534/genetics.118.301319>
- 1054 Stern, D. L., & Orgogozo, V. (2008). The loci of evolution: How predictable is genetic evolution?
- 1055 *Evolution*, 62(9), 2155–2177. <https://doi.org/10.1111/j.1558-5646.2008.00450.x>
- 1056 Tataru, P., & Bataillon, T. (2019). polyDFEv2.0: testing for invariance of the distribution of fitness
- 1057 effects within and across species. *Bioinformatics*, 35(16), 2868–2869.
- 1058 <https://doi.org/10.1093/bioinformatics/bty1060>
- 1059 Tataru, P., Mollion, M., Glemin, S., & Bataillon, T. (2017). Inference of distribution of fitness effects
- 1060 and proportion of adaptive substitutions from polymorphism data. *Genetics*, 207(3), 1103–
- 1061 1119. <https://doi.org/10.1534/genetics.117.300323>
- 1062 Teschke, M., Mukabayire, O., Wiehe, T., & Tautz, D. (2008). Identification of selective sweeps in
- 1063 closely related populations of the house mouse based on microsatellite scans. *Genetics*, 180,
- 1064 1537–1545.
- 1065 Thybert, D., Roller, M., Navarro, F. C. P., Fiddes, I., Streeter, I., Feig, C., Martin-Galvez, D.,

- 1066 Kolmogorov, M., Janoušek, V., Akanni, W., Aken, B., Aldridge, S., Chakrapani, V., Chow, W.,  
1067 Clarke, L., Cummins, C., Doran, A., Dunn, M., Goodstadt, L., ... Flicek, P. (2018). Repeat  
1068 associated mechanisms of genome evolution and function revealed by the *Mus caroli* and  
1069 *Mus pahari* genomes. *Genome Research*, *28*(4), 448–459.  
1070 <https://doi.org/10.1101/gr.234096.117>
- 1071 Torres, R., Stetter, M. G., Hernandez, R. D., & Ross-Ibarra, J. (2020). The Temporal Dynamics of  
1072 Background Selection in Nonequilibrium Populations. *Genetics*, *214*(4), 1019–1030.  
1073 <https://doi.org/10.1534/genetics.119.302892>
- 1074 Uchimura, A., Higuchi, M., Minakuchi, Y., Ohno, M., Toyoda, A., Fujiyama, A., Miura, I., Wakana, S.,  
1075 Nishino, J., & Yagi, T. (2015). Germline mutation rates and the long-term phenotypic effects  
1076 of mutation accumulation in wild-type laboratory mice and mutator mice. *Genome Research*,  
1077 *25*(8), 1125–1134. <https://doi.org/10.1101/gr.186148.114>
- 1078 Wiehe, T., & Stephan, W. (1993). Analysis of a genetic hitchhiking model, and its application to  
1079 DNA polymorphism data from *Drosophila melanogaster*. *Molecular Biology and Evolution*,  
1080 *10*(4), 842–854.
- 1081 Williamson, R. J., Josephs, E. B., Platts, A. E., Hazzouri, K. M., Haudry, A., Blanchette, M., & Wright,  
1082 S. I. (2014). Evidence for widespread positive and negative selection in coding and conserved  
1083 noncoding regions of *Capsella grandiflora*. *PLoS Genetics*, *10*(9), e1004622.  
1084 <https://doi.org/10.1371/journal.pgen.1004622>
- 1085 Wray, G. A. (2007). The evolutionary significance of cis-regulatory mutations. *Nature Reviews*  
1086 *Genetics*, *8*(3), 206–216. <https://doi.org/10.1038/nrg2063>  
1087  
1088



## 1089 Supplementary Material

### 1090 Appendix: Analyses assuming LD-based 1091 recombination maps

1092

#### 1093 Generating LD-based recombination rate maps

1094 We phased variant calls using the read-aware methodology incorporated in SHAPEIT2 (Delaneau  
1095 et al., 2013). For each of the mouse population samples, we carried out the following procedure.  
1096 First, we created a stringently filtered set of SNPs following Booker et al. (2017), by only including  
1097 biallelic variant sites that met the following criteria: no overlap with indels, no missing data, QUAL  
1098  $\geq 30$ , genotype quality (GQ) greater than or equal to 15 in all individual genotypes, sequencing  
1099 depth (DP) greater than or equal to 10 for all individuals, rejected sites with significant deviation  
1100 from Hardy-Weinberg equilibrium at the level  $p < 0.05$ ). Using the filtered variants, we extracted  
1101 phase informative reads. We then ran SHAPEIT2 in ‘assemble’ mode to phase our stringently  
1102 filtered variants. Finally, we converted the output of SHAPEIT2 to FASTA files, which contained two  
1103 haplotypes per diploid sample using custom Python scripts.

1104

1105 We ran LDhelmet version 1.9 (Chan et al. 2012) on the phased haplotypes, in order to estimate  
1106 the population-scaled recombination rate,  $\rho = 4N_e r$ , where  $N_e$  is the effective population size and  $r$   
1107 is the rate of crossing over between two sites per generation, for each of the mouse populations.  
1108 We calculated the ancestral prior probability for each variant site that we passed to LDhelmet  
1109 using the method developed by Keightley & Jackson (2018) as implemented in the program *est-sfs*  
1110 v2.01. As input for this program, we generated files including each variant and invariant site that  
1111 met less stringent filtering criteria than that described above (QUAL  $> 30$ , no missing data, no  
1112 overlap with indels, ExcessHet  $< 13$ , no more than two alleles per site), and additionally discarded  
1113 sites that did not have full outgroup information (alleles from both *Mus famulus* and *Mus pahari*  
1114 for mouse samples mapped to mm10). For sites that were present in the input to LDhelmet, but  
1115 not in the input for the Keightley & Jackson (2018) method, because they lacked complete  
1116 outgroup data, we assigned the ancestral prior following Equation 18 in Keightley & Jackson  
1117 (2018). We used the resulting information about the ancestral states of SNPs to populate the 4x4

1118 mutation transition matrix used by LDhelmet (Chan et al. 2012). To estimate fine-scale  
1119 recombination rates in each of our populations, we ran the *find\_confs* component of LDhelmet  
1120 with a window size (-w) of 50 SNPs to generate haplotype configuration files from the phased  
1121 FASTA files we made in the step above. Subsequently, we ran the *table\_gen* and *pade* components  
1122 of LDhelmet with the default parameters, with the exception of  $\theta$  [-t] which we set to the point  
1123 estimate of  $\pi$  at 4-fold degenerate synonymous sites specific to each population. To estimate  $\rho$  we  
1124 ran the *rjmc* component of LDhelmet with a width [-w] of 50 SNPs, a block penalty [-b] of 100, a  
1125 partition length of 4001 SNPs, an overlap of 200 SNPs, a burn-in period of 100,000 iterations  
1126 followed by 1,000,000 iterations of the Markov chain.

1127

1128 Comparison of LD-based recombination rates among taxa

1129 When analysing patterns of genetic diversity under a model of selection at linked sites, the way in  
1130 which recombination rate estimates were obtained may affect parameter estimates. We analysed  
1131 the relationship between nucleotide diversity and genetic distance from functional elements in *M.*  
1132 *m. castaneus* assuming either a high-resolution recombination map constructed using patterns of  
1133 linkage disequilibrium (LD) or the pedigree-based map constructed by Cox et al. (2009). These two  
1134 approaches for generating recombination rate maps have both advantages and disadvantages. By  
1135 examining patterns of LD, the population-scaled recombination rate ( $\rho = 4N_e r$ ), where  $r$  is the  
1136 recombination rate, can be inferred from a relatively small sample of unrelated individuals at very  
1137 fine-scales. However, natural selection can influence LD and may therefore affect such  
1138 recombination rate estimates (Clark et al. 2010). Alternatively, direct estimates of the  
1139 recombination rate can be obtained from crossing experiments, but to achieve a high-resolution  
1140 recombination map, a very large number of individuals need to be genotyped and this has typically  
1141 precluded the use of whole-genome re-sequencing in some species such as mice, thereby limiting  
1142 resolution.

1143

1144 We generated recombination rate maps from patterns of LD for each of the mouse taxa, and  
1145 compared these to the pedigree-based estimates obtained by Cox et al. (2009). It is worth pointing  
1146 out that the Cox et al. (2009) map is an estimate of the recombination map that was generated  
1147 using inbred strains of mice of predominantly *M. m. domesticus* origin and there are known  
1148 differences in total genetic map length and local recombination rate between *M. musculus* sub-  
1149 species (Dumont & Payseur 2011). For simplicity, we treat the Cox map as a baseline comparison  
1150 for each of the recombination rate landscapes we inferred.

1151

1152 We calculated Spearman's correlation between LD-based recombination rate estimates obtained  
1153 for each mouse taxa and recombination rate estimates from the Cox map in windows from 1Mbp  
1154 up to 20Mbp. Across all scales tested, the recombination maps for *M. m. castaneus* and *M. m.*  
1155 *musculus* from Afghanistan showed the highest level of congruence with the Cox map (Figure A.1).  
1156 The correlation exhibited by the *M. m. castaneus* was very similar to the correlation previously  
1157 reported (Booker et al., 2017). For the purposes of calculating genetic distances, we used the LD-  
1158 based recombination rate estimates for *M. m. castaneus*.

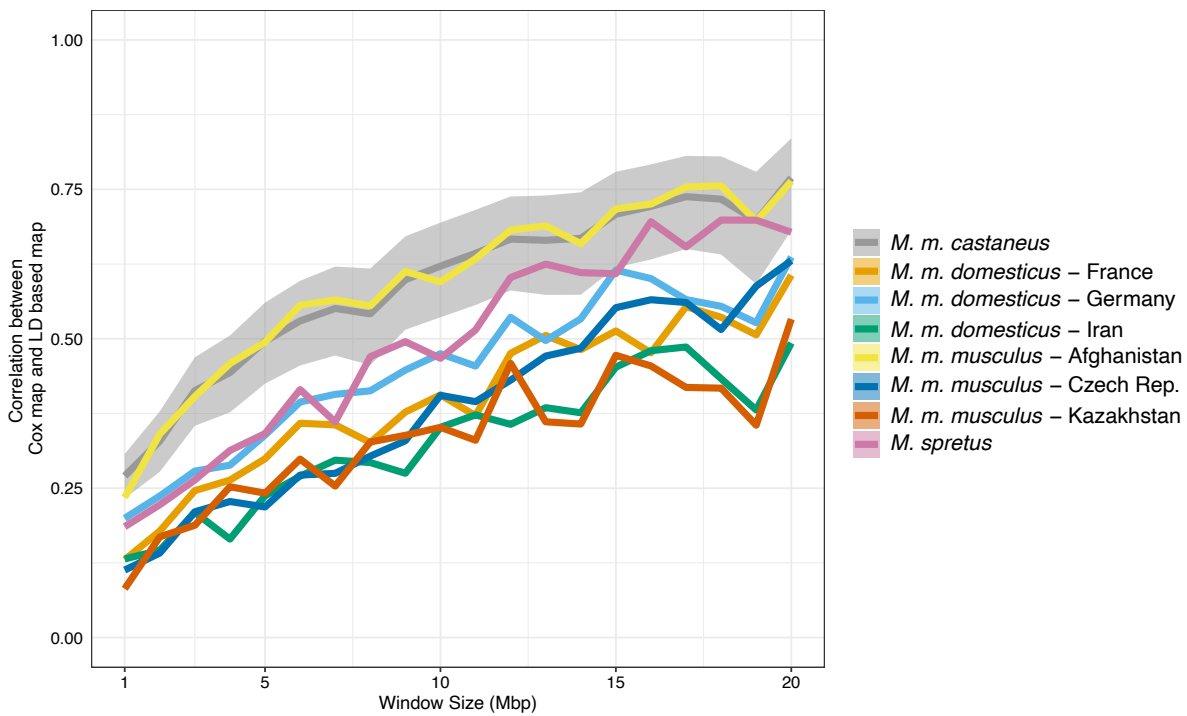

1159

1160 **Figure A.1** Spearman rank correlation coefficients between recombination maps inferred using  
1161 LDhelmet for wild mice and the pedigree-based map of Cox et al. (2009). Correlations were  
1162 calculated in non-overlapping windows of discrete physical size. For the purposes of visualisation,  
1163 the confidence interval is only shown for the *M. m. castaneus* map.

1164

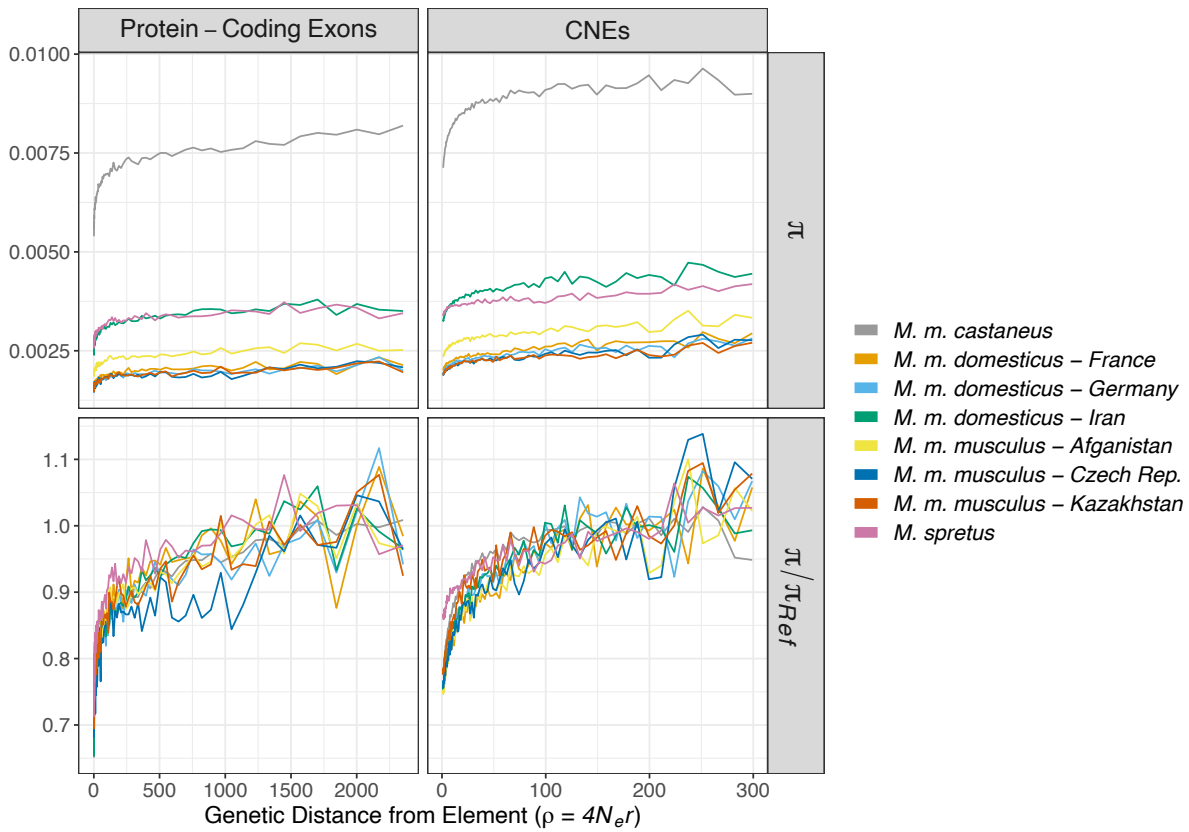

1165

1166

**Figure A.2** Identical to Figure 2 in the main text except that genetic distances were calculated assuming the LD-based recombination map constructed for *M. m. castaneus*.

1167

1168

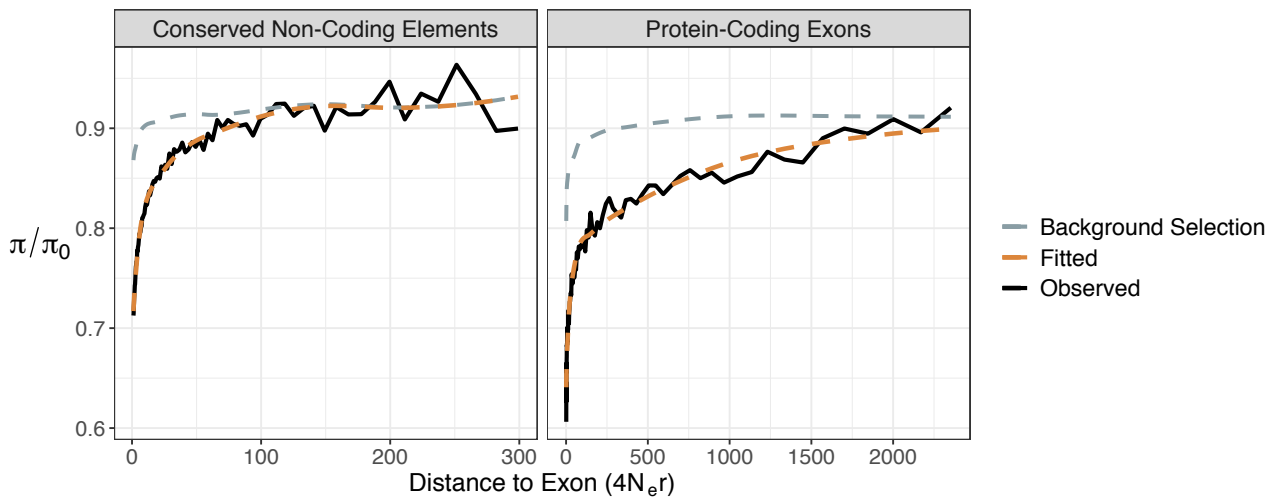

1169

1170

1171

**Supplementary Table S1** Comparison of uSFS model fits for each taxa and class of sites

1173 considered. The maximum likelihood estimate of model parameters are shown along with the

1174 estimated uSFS. A parameter key is given as a second sheet in the spreadsheet.

1175

1176 **Supplementary Table S2** Parameters of the distribution of fitness effects for deleterious mutations  
1177 as well as the positive selection parameters estimated for each population using *polyDFE*. Point  
1178 estimates are provided as well as 95% bootstrap confidence intervals. A parameter key is given as  
1179 an additional sheet in the spreadsheet.

1180

1181 **Supplementary Table S3** Estimates of positive selection parameters obtained by fitting a models  
1182 of selective sweeps and background selection to troughs in nucleotide diversity. Parameters are  
1183 given for models assuming a one or two discrete classes of advantageous mutations as well as an  
1184 exponential distribution of fitness effects. Estimates of the fitness change brought about by  
1185 positive selection in protein-coding exons and CNEs are also given in the table. A parameter key is  
1186 given as an additional sheet in the spreadsheet.

1187

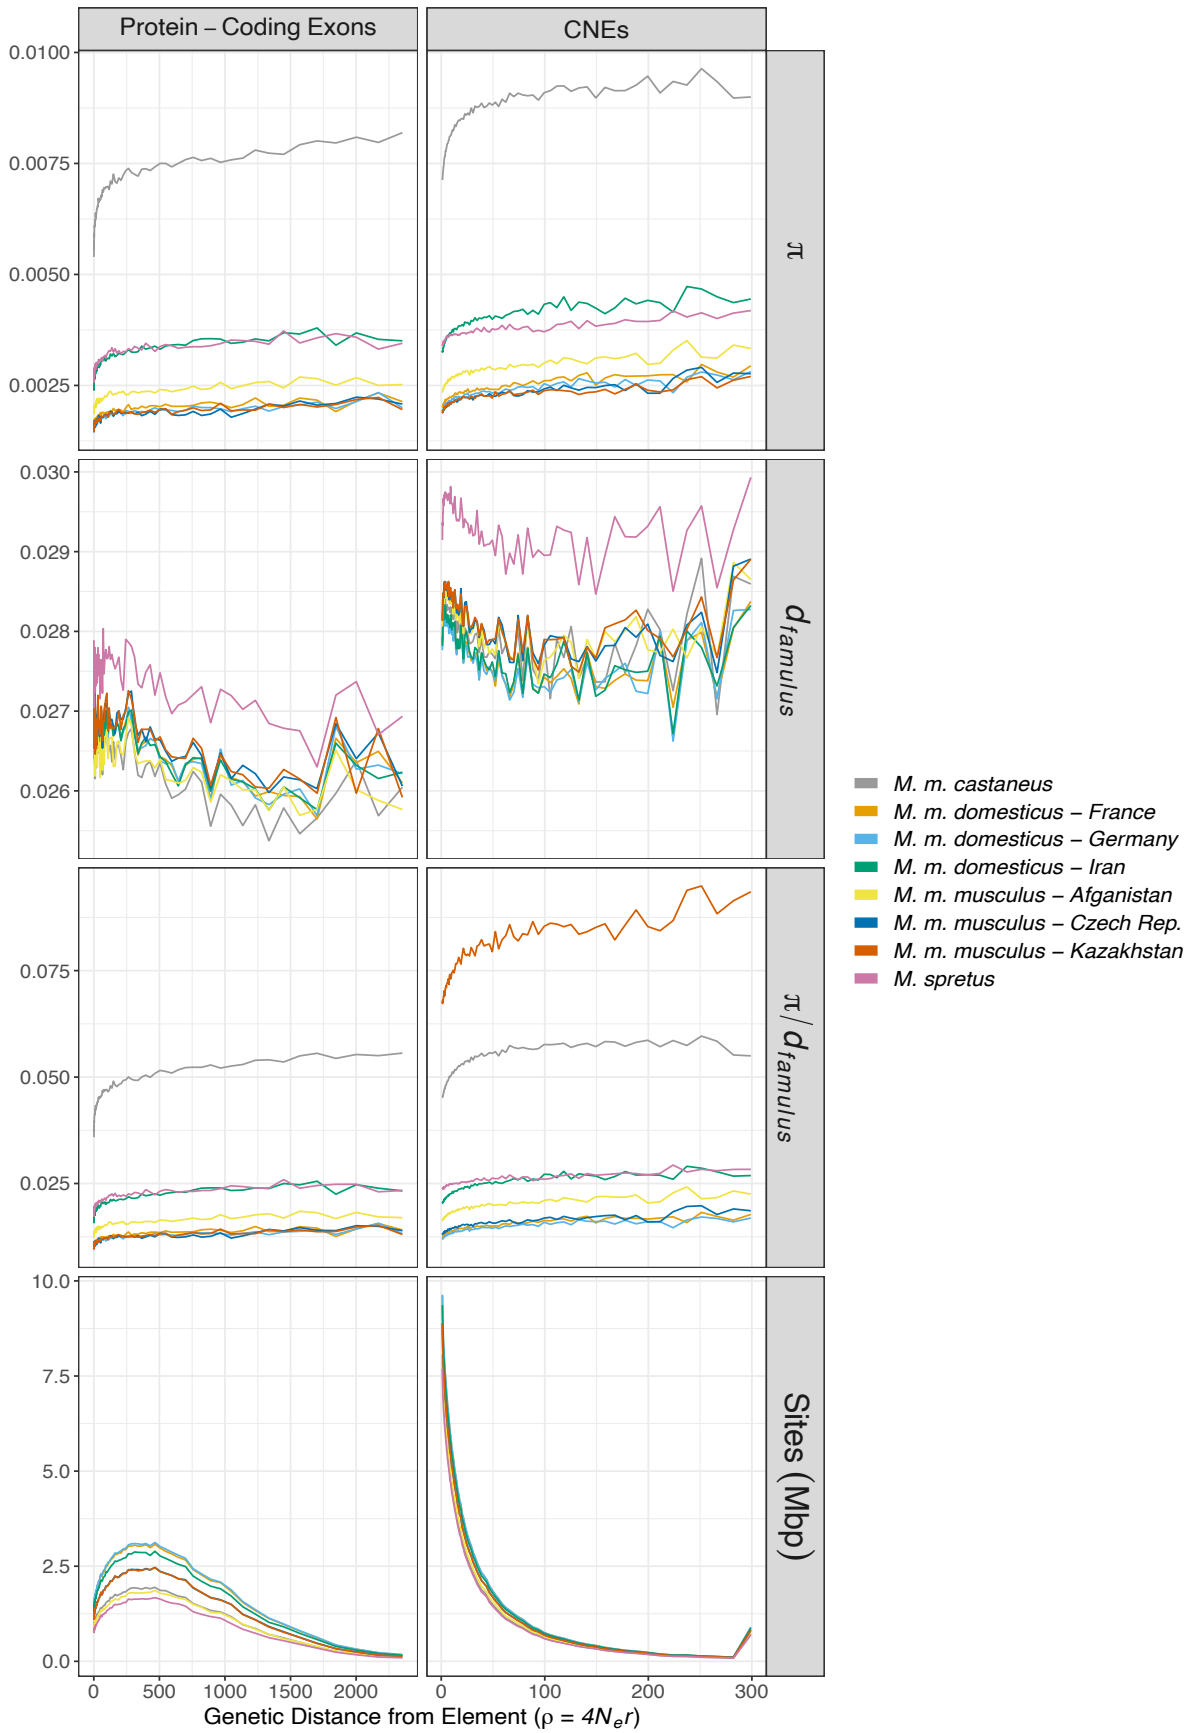

1188

1189 **Figure S1** Additional summary statistics in the regions surrounding functional elements assuming  
 1190 the LD-based map of recombination rate variation we inferred for *M. m. castaneus*.

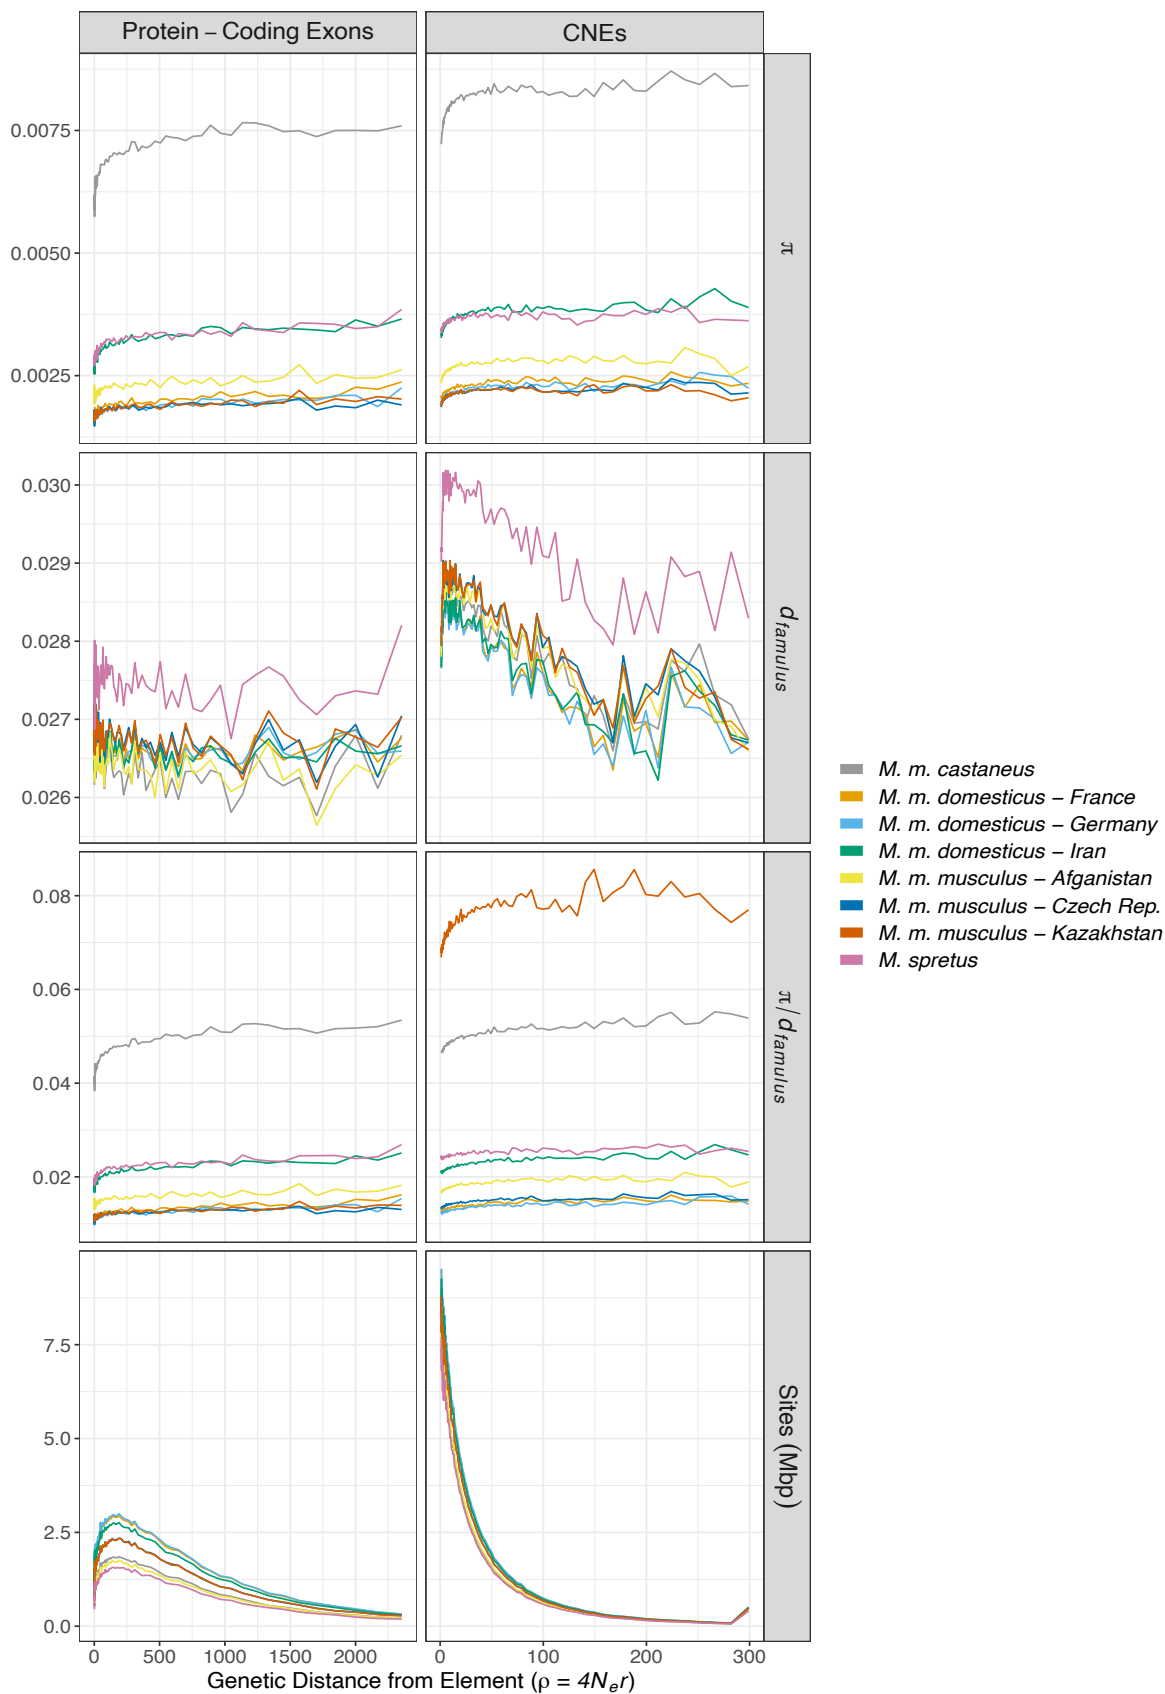

1191

1192 **Figure S2** Additional summary statistics in the regions flanking functional elements assuming the

1193 Cox map.

1194

1195

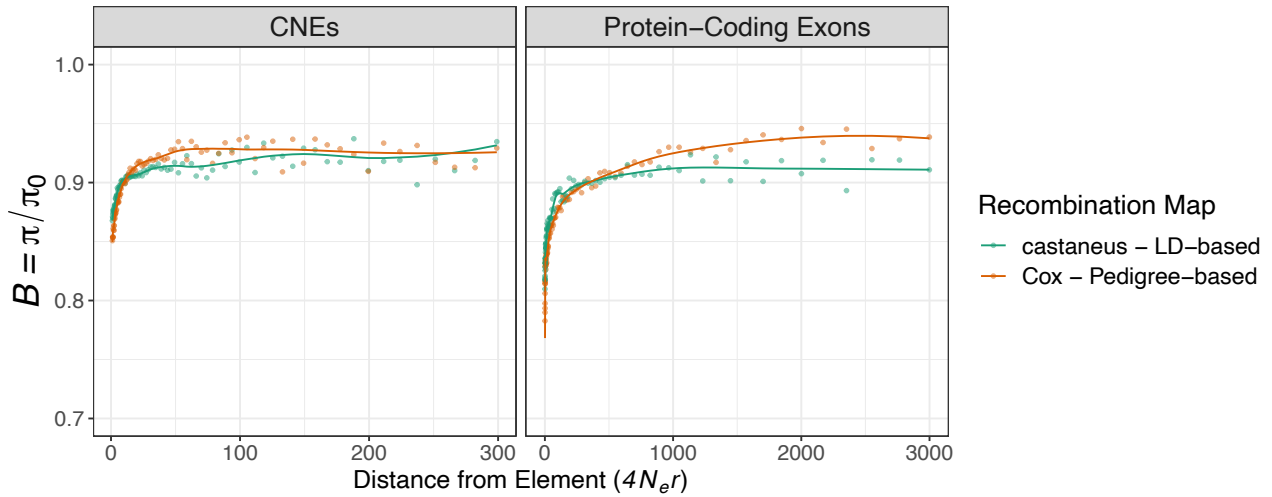

1196

1197 **Figure S3** The reduction in neutral genetic diversity relative to neutral expectation caused by  
1198 background selection ( $B$ ) observed in simulated datasets. Simulations assumed either the LD-  
1199 based recombination map or the pedigree-based map of Cox et al. (2009). Lines indicate the fit of  
1200 a Loess regression fitted to the data with a span of 0.3 and the number of sites in each bin used as  
1201 weights.

1202

1203

1204



1205

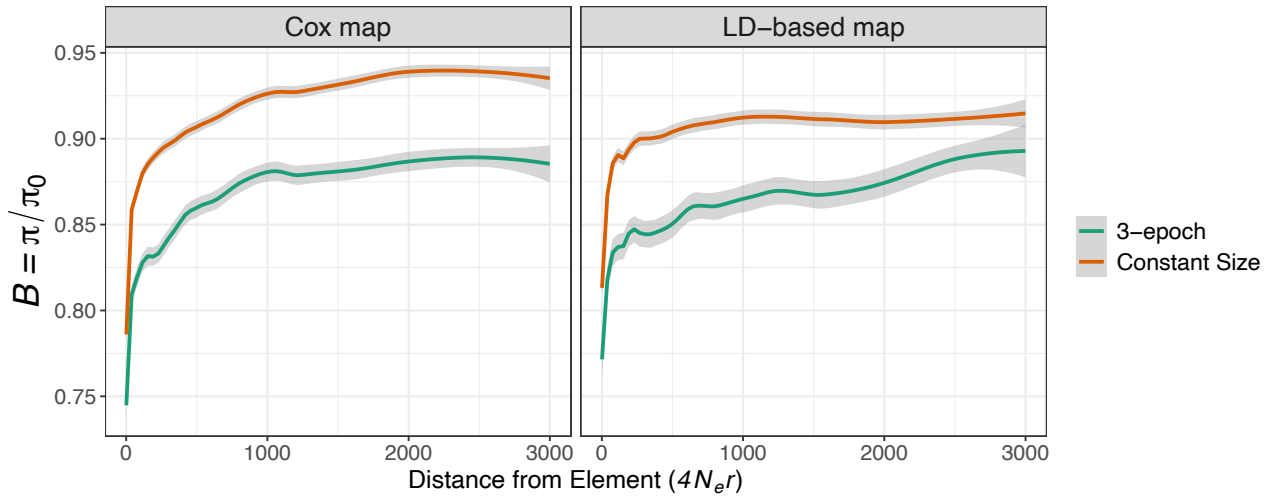

1206

1207

1208

1209

1210

1211

1212

1213

1214

**Figure S4** The reductions in neutral genetic diversity relative to neutral expectation caused by background selection ( $B$ ) observed in simulated datasets when modelling a population with constant size, or the three-epoch demographic model estimated by Booker and Keightley (2018).  $\pi_0$  in the constant size simulations was 0.01.  $\pi_0$  was 0.0042 in the 3-epoch simulations, which was calculated from the harmonic mean of population sizes. Lines indicate the fit of a Loess regression fitted to the data.
